# Supplementary material for: Impact of van der Waals interactions on the structural and nonlinear optical properties of azobenzene switches
Source: Royal Society of Chemistry journal article supplement (doi:10.1039/d1cp02500g), 2021-01-01
Supplement: d1cp02500g1.pdf [file d1cp02500g1.pdf]

**Supporting Information:**

**Impact of Van der Waals interactions on  
structural and nonlinear optical properties of  
azobenzene switches**

Carmelo Naim,<sup>†,‡</sup> Frédéric Castet,<sup>\*,†,¶</sup> and Eduard Matito<sup>\*,†,¶</sup>

<sup>†</sup>*Donostia International Physics Center (DIPC), Manuel Lardizabal Ibilbidea 4, 20018  
Donostia, Euskadi, Spain*

<sup>‡</sup>*Institut des Sciences Moléculaires (ISM, UMR CNRS 5255), University of Bordeaux, 351  
Cours de la Libération, 33405 Talence, France*

<sup>¶</sup>*Ikerbasque Foundation for Science, 48011 Bilbao, Euskadi, Spain*

E-mail: frederic.castet@u-bordeaux.fr; ematito@gmail.com

# Contents

|           |                                                                             |             |
|-----------|-----------------------------------------------------------------------------|-------------|
| <b>1</b>  | <b>Performance of RI-CC2 and RI-MP2 methods for dispersion interactions</b> | <b>S-3</b>  |
| <b>2</b>  | <b>Impact of the basis set</b>                                              | <b>S-5</b>  |
| <b>3</b>  | <b>Density functional approximations</b>                                    | <b>S-5</b>  |
| <b>4</b>  | <b>Correlation indicators for CC2 calculations</b>                          | <b>S-6</b>  |
| <b>5</b>  | <b>Geometrical parameters of <i>E</i> isomers</b>                           | <b>S-7</b>  |
| <b>6</b>  | <b>RMSD analysis without hydrogens</b>                                      | <b>S-8</b>  |
| <b>7</b>  | <b>RMSD analysis with hydrogens</b>                                         | <b>S-16</b> |
| <b>8</b>  | <b>Relative <i>Z-E</i> energies</b>                                         | <b>S-25</b> |
| 8.1       | CC2 <i>vs</i> MP2 . . . . .                                                 | S-25        |
| 8.2       | DFT relative <i>Z-E</i> energies . . . . .                                  | S-27        |
| <b>9</b>  | <b>Calculations for the Ph molecule</b>                                     | <b>S-34</b> |
| <b>10</b> | <b>Nonlinear Optical properties</b>                                         | <b>S-35</b> |
| 10.1      | Reference RI-MP2 results . . . . .                                          | S-35        |
| 10.2      | <i>ab initio</i> results . . . . .                                          | S-36        |
| 10.3      | DFT results . . . . .                                                       | S-37        |
| <b>11</b> | <b>PNOC analysis</b>                                                        | <b>S-41</b> |
|           | <b>References</b>                                                           | <b>S-45</b> |

# 1 Performance of RI-CC2 and RI-MP2 methods for dispersion interactions

In order to verify that the choice of RI-CC2 as reference geometry is valid for the systems under investigation, we evaluated the performances of both RI-CC2 and RI-MP2 methods on the benchmark dataset Diet-GMTKN55.<sup>S1</sup> Among all the molecules of the set we reproduced 20 energy differences which belong to the subset of "Intramolecular noncovalent interactions", namely the molecules of Diet-GMTKN55 which also belong to the sets: ACONF, BUT14DIOL, IDISP, MCONF, PCONF21, SCONF and UPU23. The calculations have been performed using the cc-pVDZ basis set. The results are reported in Table S1. Both RI-CC2 and RI-MP2 methods reproduce the reference data to a good accuracy (the MAE is 1.93 for RI-CC2 and 1.76 for RI-MP2).

Table S1: Collection of the energies of the Intramolecular non-covalent interactions on the Diet-GMTKN55. On the first column is indicated the name of the corresponding subset, while on the second and third columns the molecules considered as reactant and product for the calculation of the energy difference. All the energies are in kcal/mol. The geometries and reference methods can be found in the reference paper.<sup>S1</sup>

| Dataset   | Reactants | Products | $\Delta E_{Ref}$ | $\Delta E_{RI-CC2}$ | $\Delta E_{RI-MP2}$ |
|-----------|-----------|----------|------------------|---------------------|---------------------|
| ACONF     | H_ttt     | H_g+x-t+ | 2.63             | 2.78                | 2.79                |
|           | H_ttt     | H_x+g-g- | 3.08             | 3.26                | 3.29                |
| BUt14DIOL | B1        | B3       | 0.30             | 0.50                | 0.44                |
|           | B1        | B30      | 2.85             | 4.24                | 4.15                |
|           | B1        | B33      | 2.63             | 5.57                | 5.25                |
|           | B1        | B39      | 3.06             | 4.71                | 4.58                |
|           | B1        | B40      | 3.10             | 5.40                | 5.05                |
|           | B1        | B43      | 3.29             | 4.97                | 4.75                |
|           | B1        | B44      | 3.59             | 6.04                | 5.67                |
|           | B1        | B54      | 3.15             | 6.04                | 5.67                |
| IDISP     | octane1   | octane2  | -1.21            | 4.27                | 3.53                |
| MCONF     | 1         | 12       | 4.45             | 4.31                | 3.83                |
|           | 1         | 21       | 3.11             | 5.60                | 5.38                |
|           | 1         | 31       | 4.86             | 6.62                | 6.42                |
| PCONF21   | 99        | 366      | 0.70             | 3.96                | 3.62                |
| SCONF     | G1        | G3       | 6.16             | -0.63               | 0.29                |
| UPU23     | 2p        | 1b       | 2.97             | 1.20                | 1.80                |
|           | 2p        | 1g       | 2.20             | 1.58                | 1.81                |
|           | 2p        | 7a       | 7.26             | 7.43                | 5.80                |
|           | 2p        | 4b       | 5.48             | 5.74                | 5.80                |
|           |           |          | RMSE             | 1.41                | 1.28                |
|           |           |          | MAE              | 1.93                | 1.76                |

## 2 Impact of the basis set

Table S2:  $Z$ - $E$  energy differences ( $\Delta E_{EZ}$ , kcal/mol) calculated at the RI-CC2 level using the cc-pVDZ and cc-pVTZ basis sets.

|            | <b>a</b> (R = H) | <b>b</b> (R = Me) |
|------------|------------------|-------------------|
| cc-pVDZ    | 11.5             | 10.9              |
| cc-pVTZ    | 10.8             | 10.0              |
| Difference | 0.7              | 0.9               |

Table S3: RMSD ( $\text{\AA}$ ) between geometries optimized at the RI-CC2/cc-pVDZ and RI-CC2/cc-pVTZ levels for  $E$  and  $Z$  isomers.

| Molecule          | RMSD ( $E$ ) | RMSD ( $Z$ ) |
|-------------------|--------------|--------------|
| <b>a</b> (R = H)  | 0.000        | 0.000        |
| <b>b</b> (R = Me) | 0.000        | 0.026        |

## 3 Density functional approximations

Table S4: DFT exchange-correlation functionals (DFAs) considered in this study, with the type of approximation, amount of exact HF exchange (HFX) and applied dispersion correction (Disp.).

| DFA acronym        | Type                 | % of HFX            | Ref.             | Disp.                 |
|--------------------|----------------------|---------------------|------------------|-----------------------|
| PBE                | pure GGA             | 0                   | S2               | PBE-D3                |
| M06L               | pure GGA             | 0                   | S3               | -                     |
| rPW86PBE           | pure GGA             | 0                   | S4               | rPW86PBE-VV           |
| B3LYP              | hybrid GGA           | 20                  | S5               | B3LYP-D3              |
| PBE0               | hybrid GGA           | 25                  | S6               | PBE0-D3               |
| M06                | hybrid GGA           | 27                  | S3               | -                     |
| BH&H               | hybrid GGA           | 50                  | S7 (G16 version) | -                     |
| M06-2X             | hybrid GGA           | 57                  | S3               | M06-2X-D3             |
| M06-HF             | hybrid GGA           | 100                 | S3               | -                     |
| CAM-B3LYP          | hybrid RS (0.33)     | 19 (SR), 65 (LR)    | S8               | CAM-B3LYP-D3          |
| LC- $\omega$ PBE   | hybrid RS (0.40)     | 0 (SR), 100 (LR)    | S9               | LC- $\omega$ PBE-D3   |
| LC- $\omega$ PBE08 | hybrid RS (0.45)     | 0 (SR), 100 (LR)    | S4               | LC- $\omega$ PBE08-VV |
| LC-BLYP            | hybrid RS (0.47)     | 0 (SR), 100 (LR)    | S10              | -                     |
| T $\alpha$ -BLYP   | hybrid RS (variable) | 0 (SR), 100 (LR)    | S11              | -                     |
| $\omega$ B97X      | hybrid RS (0.30)     | 15.8 (SR), 100 (LR) | S12              | $\omega$ B97X-D       |
| $\omega$ B97X-D    | hybrid RS (0.20)     | 22.2 (SR), 100 (LR) | S13              | -                     |

GGA: Generalized Gradient Approximation; RS: Range Separated (with standard range parameter  $\omega$  given in Bohr $^{-1}$ ); SR: Short Range; LR: Long Range.

## 4 Correlation indicators for CC2 calculations

Table S5: Evaluation of D1 and  $I_{ND}$  diagnostic calculated on the optimized geometry at the CC2 level with the cc-pVDZ basis set. The D1 threshold for molecules with a potential multireference character is 0.05. In the case of  $I_{ND}$ , we can take the dissociation of the  $H_2$  molecule as a reference. The dissociated molecule gives  $I_{ND} = 0.5$ , whereas  $I_{ND} = 0.025$  corresponds to the equilibrium geometry of  $H_2$  molecule.<sup>S14</sup> In the present case, all the molecules display  $I_{ND} \leq 0.025$ , and, hence, they are not expected to present large multireference character.

| Isomer                     | $E$   |          | $Z$   |          |
|----------------------------|-------|----------|-------|----------|
|                            | D1    | $I_{ND}$ | D1    | $I_{ND}$ |
| Molecule                   |       |          |       |          |
| <b>a</b> (R = H)           | 0.046 | 0.023    | 0.053 | 0.024    |
| <b>b</b> (R = Me)          | 0.049 | 0.022    | 0.053 | 0.022    |
| <b>c</b> (R = <i>i</i> Pr) | 0.049 | 0.021    | 0.051 | 0.021    |
| <b>d</b> (R = <i>t</i> Bu) | 0.050 | 0.021    | 0.052 | 0.021    |
| <b>e</b> (R = Ph)          | 0.048 | 0.024    | 0.050 | 0.025    |
| <b>f</b> (R = Cy)          | 0.050 | 0.020    | 0.051 | 0.020    |
| <b>g</b> (R = Ad)          | 0.051 | 0.020    | 0.052 | 0.021    |

## 5 Geometrical parameters of *E* isomers

Table S6: Characteristic distances and angles in the *E* isomers of the investigated molecules (Figure 1), as calculated at the RI-CC2, RI-MP2 and HF methods levels.

| Molecule                   | $d_{NN}[\text{Å}]$ | $d_{NC}[\text{Å}]$ | $\theta_{NNC}[\text{°}]$ | $\phi_{CNNC}[\text{°}]$ |
|----------------------------|--------------------|--------------------|--------------------------|-------------------------|
| HF/cc-pVDZ                 |                    |                    |                          |                         |
| <b>a</b> (R = H)           | 1.22               | 1.43               | 116                      | 180                     |
| <b>b</b> (R = Me)          | 1.22               | 1.43               | 116                      | 180                     |
| <b>c</b> (R = <i>i</i> Pr) | 1.22               | 1.43               | 116                      | 180                     |
| <b>d</b> (R = <i>t</i> Bu) | 1.22               | 1.43               | 116                      | 180                     |
| <b>e</b> (R = Ph)          | 1.22               | 1.43               | 116                      | 180                     |
| <b>f</b> (R = Cy)          | 1.22               | 1.43               | 116                      | 180                     |
| <b>g</b> (R = Ad)          | 1.22               | 1.43               | 116                      | 180                     |
| RI-MP2/cc-pVDZ             |                    |                    |                          |                         |
| <b>a</b> (R = H)           | 1.28               | 1.43               | 113                      | 180                     |
| <b>b</b> (R = Me)          | 1.28               | 1.42               | 113                      | 180                     |
| <b>c</b> (R = <i>i</i> Pr) | 1.28               | 1.42               | 113                      | 180                     |
| <b>d</b> (R = <i>t</i> Bu) | 1.28               | 1.42               | 113                      | 180                     |
| <b>e</b> (R = Ph)          | 1.28               | 1.42               | 113                      | 180                     |
| <b>f</b> (R = Cy)          | 1.28               | 1.42               | 113                      | 180                     |
| <b>g</b> (R = Ad)          | 1.28               | 1.42               | 113                      | 180                     |
| RI-CC2/cc-pVDZ             |                    |                    |                          |                         |
| <b>a</b> (R = H)           | 1.28               | 1.43               | 113                      | 180                     |
| <b>b</b> (R = Me)          | 1.29               | 1.43               | 113                      | 180                     |
| <b>c</b> (R = <i>i</i> Pr) | 1.29               | 1.43               | 113                      | 180                     |
| <b>d</b> (R = <i>t</i> Bu) | 1.29               | 1.42               | 113                      | 180                     |
| <b>e</b> (R = Ph)          | 1.29               | 1.43               | 113                      | 180                     |
| <b>f</b> (R = Cy)          | 1.29               | 1.42               | 114                      | 180                     |
| <b>g</b> (R = Ad)          | 1.29               | 1.42               | 113                      | 180                     |

## 6 RMSD analysis without hydrogens

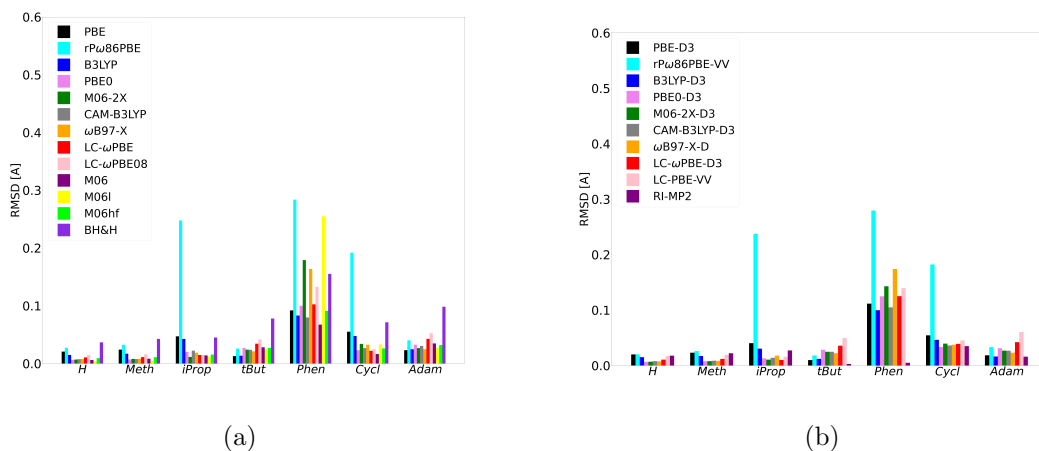

Figure S1: RMSD without hydrogens between DFT and CC2 geometries for *trans* isomers, calculated using DFAs without (left) and with (right) dispersion corrections. RI-MP2 results are also shown for comparison.

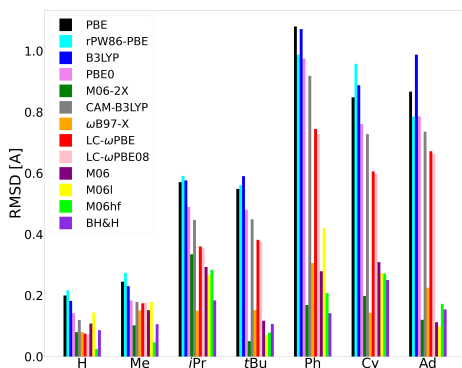

Figure S2: RMSD without hydrogens between DFAs and CC2 geometries for *cis* isomers, calculated using DFAs without dispersion corrections. RI-MP2 results are also shown for comparison.



Table S7: RMSD without hydrogens ( $\text{\AA}$ ) between geometries optimized using DFAs with and without dispersion corrections (in parenthesis) for  $E$  and  $Z$  isomers.

| Molecule                     | Approx.                | RMSD ( $E$ ) | RMSD ( $Z$ ) |
|------------------------------|------------------------|--------------|--------------|
| <b>a</b> (R = <b>H</b> )     | PBE(D3)                | 0.00         | 0.04         |
|                              | rPW86PBE(VV)           | 0.00         | 0.00         |
|                              | PBE0(D3)               | 0.00         | 0.04         |
|                              | B3LYP(D3)              | 0.00         | 0.00         |
|                              | M06-2X(D3)             | 0.00         | 0.00         |
|                              | CAM-B3LYP(D3)          | 0.00         | 0.00         |
|                              | LC- $\omega$ PBE(D3)   | 0.00         | 0.05         |
|                              | LC- $\omega$ PBE(VV)   | 0.00         | 0.00         |
|                              | $\omega$ B97X(D)       | 0.00         | 0.01         |
| <b>b</b> (R = <b>Meth</b> )  | PBE(D3)                | 0.00         | 0.07         |
|                              | rPW86PBE(VV)           | 0.00         | 0.00         |
|                              | PBE0(D3)               | 0.00         | 0.07         |
|                              | B3LYP(D3)              | 0.00         | 0.00         |
|                              | M06-2X(D3)             | 0.00         | 0.01         |
|                              | CAM-B3LYP(D3)          | 0.00         | 0.00         |
|                              | LC- $\omega$ PBE(D3)   | 0.00         | 0.01         |
|                              | LC- $\omega$ PBE08(VV) | 0.00         | 0.00         |
|                              | $\omega$ B97-X(D)      | 0.00         | 0.05         |
| <b>c</b> (R = <b>iProp</b> ) | PBE(D3)                | 0.01         | 0.52         |
|                              | rPW86PBE(VV)           | 0.00         | 0.00         |
|                              | PBE0(D3)               | 0.01         | 0.45         |
|                              | B3LYP(D3)              | 0.01         | 0.00         |
|                              | M06-2X(D3)             | 0.00         | 0.04         |
|                              | CAM-B3LYP(D3)          | 0.01         | 0.44         |
|                              | LC- $\omega$ PBE(D3)   | 0.01         | 0.00         |
|                              | LC- $\omega$ PBE08(VV) | 0.00         | 0.00         |
|                              | $\omega$ B97-X(D)      | 0.00         | 0.12         |

| Molecule                    | Approx.                | RMSD ( $E$ ) | RMSD ( $Z$ ) |
|-----------------------------|------------------------|--------------|--------------|
| <b>d</b> (R = <b>tBut</b> ) | PBE(D3)                | 0.00         | 0.42         |
|                             | rPW86PBE(VV)           | 0.00         | 0.00         |
|                             | PBE0(D3)               | 0.00         | 0.63         |
|                             | B3LYP(D3)              | 0.01         | 0.00         |
|                             | M06-2X(D3)             | 0.00         | 0.04         |
|                             | CAM-B3LYP(D3)          | 0.00         | 0.35         |
|                             | LC- $\omega$ PBE(D3)   | 0.00         | 0.38         |
|                             | LC- $\omega$ PBE08(VV) | 0.00         | 0.00         |
|                             | $\omega$ B97-X(D)      | 0.00         | 0.18         |
| <b>e</b> (R = <b>Phen</b> ) | PBE(D3)                | 0.03         | 0.87         |
|                             | rPW86PBE(VV)           | 0.00         | 0.00         |
|                             | PBE0(D3)               | 0.03         | 0.79         |
|                             | B3LYP(D3)              | 0.02         | 0.00         |
|                             | M062X(D3)              | 0.04         | 0.04         |
|                             | CAM-B3LYP(D3)          | 0.03         | 0.80         |
|                             | LC- $\omega$ PBE(D3)   | 0.03         | 0.65         |
|                             | LC- $\omega$ PBE08(VV) | 0.00         | 0.00         |
|                             | $\omega$ B97-X(D)      | 0.02         | 0.20         |
| <b>f</b> (R = <b>Cycl</b> ) | PBE(D3)                | 0.02         | 0.82         |
|                             | rPW86PBE(VV)           | 0.00         | 0.00         |
|                             | PBE0(D3)               | 0.02         | 0.75         |
|                             | B3LYP(D3)              | 0.03         | 0.00         |
|                             | M06-2X(D3)             | 0.01         | 0.03         |
|                             | CAM-B3LYP(D3)          | 0.02         | 0.75         |
|                             | LC- $\omega$ PBE(D3)   | 0.02         | 0.63         |
|                             | LC-PBE08(VV)           | 0.00         | 0.00         |
|                             | $\omega$ B97-X(D)      | 0.01         | 0.13         |
| <b>g</b> (R = <b>Adam</b> ) | PBE(D3)                | 0.01         | 0.79         |
|                             | rPW86PBE(VV)           | 0.00         | 0.00         |
|                             | PBE0(D3)               | 0.01         | 0.70         |
|                             | B3LYP(D3)              | 0.02         | 0.00         |
|                             | M06-2X(D3)             | 0.00         | 0.06         |
|                             | CAM-B3LYP(D3)          | 0.01         | 0.61         |
|                             | LC- $\omega$ PBE(D3)   | 0.01         | 0.54         |
|                             | LC- $\omega$ PBE08(VV) | 0.00         | 0.00         |
|                             | $\omega$ B97-X(D)      | 0.01         | 0.22         |

Table S8: RMSD without hydrogens ( $\text{\AA}$ ) between DFAs and CC2 geometries for  $E$  and  $Z$  isomers, calculated using DFAs without and with dispersion corrections. RMSD between MP2 and CC2 geometries are also reported.

| Compound                 | Approx.               | RMSD ( $E$ ) | RMSD ( $Z$ ) |
|--------------------------|-----------------------|--------------|--------------|
| <b>a</b> (R = <b>H</b> ) | RI-MP2                | 0.02         | 0.01         |
|                          | PBE                   | 0.02         | 0.20         |
|                          | PBE-D3                | 0.02         | 0.17         |
|                          | rPW86PBE              | 0.03         | 0.22         |
|                          | rPW86PBE-VV           | 0.02         | 0.17         |
|                          | PBE0                  | 0.01         | 0.14         |
|                          | PBE0-D3               | 0.01         | 0.11         |
|                          | B3LYP                 | 0.01         | 0.18         |
|                          | B3LYP-D3              | 0.01         | 0.13         |
|                          | CAM-B3LYP             | 0.01         | 0.12         |
|                          | CAM-B3LYP-D3          | 0.01         | 0.08         |
|                          | LC- $\omega$ PBE      | 0.01         | 0.07         |
|                          | LC- $\omega$ PBE-D3   | 0.01         | 0.05         |
|                          | LC- $\omega$ PBE08    | 0.01         | 0.07         |
|                          | LC- $\omega$ PBE08-VV | 0.02         | 0.04         |
|                          | $\omega$ B97-X        | 0.01         | 0.08         |
|                          | $\omega$ B97-X-D      | 0.01         | 0.07         |
|                          | BH&H                  | 0.04         | 0.09         |
|                          | M06                   | 0.01         | 0.11         |
|                          | M06L                  | 0.00         | 0.14         |
| M06-2X                   | 0.01                  | 0.08         |              |
| M06-2X-D3                | 0.01                  | 0.08         |              |
| M06-HF                   | 0.01                  | 0.02         |              |

| Compound                   | Approx.               | RMSD ( <i>E</i> ) | RMSD ( <i>Z</i> ) |
|----------------------------|-----------------------|-------------------|-------------------|
| <b>b</b> (R = <b>Me</b> )  | RI-MP2                | 0.02              | 0.06              |
|                            | PBE                   | 0.02              | 0.24              |
|                            | PBE-D3                | 0.02              | 0.17              |
|                            | rPW86PBE              | 0.03              | 0.27              |
|                            | rPW86PBE-VV           | 0.03              | 0.21              |
|                            | PBE0                  | 0.01              | 0.18              |
|                            | PBE0-D3               | 0.01              | 0.11              |
|                            | B3LYP                 | 0.02              | 0.23              |
|                            | B3LYP-D3              | 0.02              | 0.14              |
|                            | CAM-B3LYP             | 0.01              | 0.18              |
|                            | CAM-B3LYP-D3          | 0.01              | 0.12              |
|                            | LC- $\omega$ PBE      | 0.01              | 0.17              |
|                            | LC- $\omega$ PBE-D3   | 0.01              | 0.17              |
|                            | LC- $\omega$ PBE08    | 0.02              | 0.17              |
|                            | LC- $\omega$ PBE08-VV | 0.02              | 0.14              |
|                            | $\omega$ B97-X        | 0.01              | 0.15              |
|                            | $\omega$ B97-X-D      | 0.01              | 0.11              |
|                            | BH&H                  | 0.04              | 0.11              |
|                            | M06                   | 0.01              | 0.15              |
|                            | M06L                  | 0.01              | 0.18              |
| M06-2X                     | 0.01                  | 0.10              |                   |
| M06-2X-D3                  | 0.01                  | 0.10              |                   |
| M06-HF                     | 0.01                  | 0.05              |                   |
| <b>c</b> (R = <b>iPr</b> ) | RI-MP2                | 0.03              | 0.01              |
|                            | PBE                   | 0.05              | 0.57              |
|                            | PBE-D3                | 0.04              | 0.15              |
|                            | rPW86PBE              | 0.25              | 0.59              |
|                            | rPW86PBE-VV           | 0.24              | 0.30              |
|                            | PBE0                  | 0.02              | 0.49              |
|                            | PBE0-D3               | 0.01              | 0.13              |
|                            | B3LYP                 | 0.04              | 0.58              |
|                            | B3LYP-D3              | 0.03              | 0.12              |
|                            | CAM-B3LYP             | 0.02              | 0.45              |
|                            | CAM-B3LYP-D3          | 0.01              | 0.13              |
|                            | LC- $\omega$ PBE      | 0.01              | 0.36              |
|                            | LC- $\omega$ PBE-D3   | 0.01              | 0.36              |
|                            | LC- $\omega$ PBE08    | 0.01              | 0.35              |
|                            | LC- $\omega$ PBE08-VV | 0.02              | 0.09              |
|                            | $\omega$ B97-X        | 0.02              | 0.15              |
|                            | $\omega$ B97-X-D      | 0.02              | 0.08              |
|                            | BH&H                  | 0.05              | 0.18              |
|                            | M06                   | 0.01              | 0.29              |
|                            | M06L                  | 0.01              | 0.27              |
| M06-2X                     | 0.01                  | 0.33              |                   |
| M06-2X-D3                  | 0.01                  | 0.31              |                   |
| M06-HF                     | 0.02                  | 0.28              |                   |

| Compound                   | Approx.               | RMSD ( <i>E</i> ) | RMSD ( <i>Z</i> ) |
|----------------------------|-----------------------|-------------------|-------------------|
| <b>d</b> (R = <b>tBu</b> ) | RI-MP2                | 0.00              | 0.00              |
|                            | PBE                   | 0.01              | 0.55              |
|                            | PBE-D3                | 0.01              | 0.13              |
|                            | rPW86PBE              | 0.03              | 0.56              |
|                            | rPW86PBE-VV           | 0.02              | 0.09              |
|                            | PBE0                  | 0.03              | 0.48              |
|                            | PBE0-D3               | 0.03              | 0.11              |
|                            | B3LYP                 | 0.01              | 0.59              |
|                            | B3LYP-D3              | 0.01              | 0.09              |
|                            | CAM-B3LYP             | 0.02              | 0.45              |
|                            | CAM-B3LYP-D3          | 0.02              | 0.12              |
|                            | LC- $\omega$ PBE      | 0.03              | 0.38              |
|                            | LC- $\omega$ PBE-D3   | 0.04              | 0.08              |
|                            | LC- $\omega$ PBE08    | 0.04              | 0.38              |
|                            | LC- $\omega$ PBE08-VV | 0.05              | 0.07              |
|                            | $\omega$ B97-X        | 0.02              | 0.15              |
|                            | $\omega$ B97-X-D      | 0.02              | 0.07              |
|                            | BH&H                  | 0.08              | 0.11              |
|                            | M06                   | 0.03              | 0.12              |
|                            | M06L                  | 0.02              | 0.07              |
| M06-2X                     | 0.02                  | 0.05              |                   |
| M06-2X-D3                  | 0.02                  | 0.04              |                   |
| M06-HF                     | 0.03                  | 0.08              |                   |
| <b>e</b> (R = <b>Ph</b> )  | RI-MP2                | 0.01              | 0.02              |
|                            | PBE                   | 0.09              | 1.08              |
|                            | PBE-D3                | 0.11              | 0.22              |
|                            | rPW86PBE              | 0.28              | 0.99              |
|                            | rPW86PBE-VV           | 0.28              | 0.44              |
|                            | PBE0                  | 0.10              | 0.97              |
|                            | PBE0-D3               | 0.12              | 0.20              |
|                            | B3LYP                 | 0.08              | 1.07              |
|                            | B3LYP-D3              | 0.10              | 0.14              |
|                            | CAM-B3LYP             | 0.08              | 0.92              |
|                            | CAM-B3LYP-D3          | 0.10              | 0.18              |
|                            | LC- $\omega$ PBE      | 0.10              | 0.74              |
|                            | LC- $\omega$ PBE-D3   | 0.12              | 0.12              |
|                            | LC- $\omega$ PBE08    | 0.13              | 0.73              |
|                            | LC- $\omega$ PBE08-VV | 0.14              | 0.11              |
|                            | $\omega$ B97-X        | 0.16              | 0.31              |
|                            | $\omega$ B97-X-D      | 0.17              | 0.12              |
|                            | BH&H                  | 0.16              | 0.14              |
|                            | M06                   | 0.07              | 0.28              |
|                            | M06L                  | 0.26              | 0.42              |
| M06-2X                     | 0.18                  | 0.17              |                   |
| M06-2X-D3                  | 0.14                  | 0.13              |                   |
| M06-HF                     | 0.09                  | 0.21              |                   |

| Compound                  | Approx.               | RMSD ( $E$ ) | RMSD ( $Z$ ) |
|---------------------------|-----------------------|--------------|--------------|
| <b>f</b> (R = <b>Cy</b> ) | RI-MP2                | 0.03         | 0.01         |
|                           | PBE                   | 0.05         | 0.85         |
|                           | PBE-D3                | 0.05         | 0.14         |
|                           | rPW86PBE              | 0.19         | 0.96         |
|                           | rPW86PBE-VV           | 0.18         | 0.10         |
|                           | PBE0                  | 0.02         | 0.76         |
|                           | PBE0-D3               | 0.03         | 0.11         |
|                           | B3LYP                 | 0.05         | 0.89         |
|                           | B3LYP-D3              | 0.05         | 0.11         |
|                           | CAM-B3LYP             | 0.03         | 0.73         |
|                           | CAM-B3LYP-D3          | 0.04         | 0.13         |
|                           | LC- $\omega$ PBE      | 0.02         | 0.61         |
|                           | LC- $\omega$ PBE-D3   | 0.04         | 0.10         |
|                           | LC- $\omega$ PBE08    | 0.02         | 0.60         |
|                           | LC- $\omega$ PBE08-VV | 0.05         | 0.09         |
|                           | $\omega$ B97-X        | 0.03         | 0.14         |
|                           | $\omega$ B97-X-D      | 0.04         | 0.17         |
|                           | BH&H                  | 0.07         | 0.25         |
|                           | M06                   | 0.02         | 0.31         |
|                           | M06L                  | 0.03         | 0.27         |
|                           | M06-2X                | 0.03         | 0.20         |
|                           | M06-2X-D3             | 0.04         | 0.19         |
| M06-HF                    | 0.03                  | 0.27         |              |
| <b>g</b> (R = <b>Ad</b> ) | RI-MP2                | 0.02         | 0.03         |
|                           | PBE                   | 0.02         | 0.87         |
|                           | PBE-D3                | 0.02         | 0.43         |
|                           | rPW86PBE              | 0.04         | 0.79         |
|                           | rPW86PBE-VV           | 0.03         | 0.20         |
|                           | PBE0                  | 0.03         | 0.79         |
|                           | PBE0-D3               | 0.03         | 0.43         |
|                           | B3LYP                 | 0.02         | 0.99         |
|                           | B3LYP-D3              | 0.02         | 0.42         |
|                           | CAM-B3LYP             | 0.03         | 0.74         |
|                           | CAM-B3LYP-D3          | 0.03         | 0.43         |
|                           | LC- $\omega$ PBE      | 0.04         | 0.67         |
|                           | LC- $\omega$ PBE-D3   | 0.04         | 0.43         |
|                           | LC- $\omega$ PBE08    | 0.05         | 0.66         |
|                           | LC- $\omega$ PBE08-VV | 0.06         | 0.45         |
|                           | $\omega$ B97-X        | 0.02         | 0.23         |
|                           | $\omega$ B97-X-D      | 0.02         | 0.06         |
|                           | BH&H                  | 0.10         | 0.15         |
|                           | M06                   | 0.03         | 0.11         |
|                           | M06L                  | 0.03         | 0.10         |
|                           | M06-2X                | 0.03         | 0.12         |
|                           | M06-2X-D3             | 0.03         | 0.08         |
| M06-HF                    | 0.03                  | 0.17         |              |

Table S9: Average values of the RMSD calculations ( $\text{\AA}$ ) without the hydrogens for each set of molecules in E and Z isomers.

| Functional            | Average RMSD (E) | Average RMSD (Z) |
|-----------------------|------------------|------------------|
| RI-MP2                | 0.02             | 0.02             |
| PBE                   | 0.04             | 0.62             |
| PBE-D3                | 0.04             | 0.20             |
| rPW86PBE              | 0.12             | 0.62             |
| rPW86PBE-VV           | 0.11             | 0.22             |
| B3LYP                 | 0.03             | 0.65             |
| B3LYP-D3              | 0.03             | 0.16             |
| PBE0                  | 0.03             | 0.55             |
| PBE0-D3               | 0.03             | 0.17             |
| M06-2X                | 0.04             | 0.15             |
| M06-2X-D3             | 0.04             | 0.13             |
| CAM-B3LYP             | 0.03             | 0.51             |
| CAM-B3LYP-D3          | 0.03             | 0.17             |
| $\omega$ B97X         | 0.04             | 0.17             |
| $\omega$ B97X-D       | 0.04             | 0.10             |
| LC- $\omega$ PBE      | 0.03             | 0.43             |
| LC- $\omega$ PBE-D3   | 0.04             | 0.19             |
| LC- $\omega$ PBE08    | 0.04             | 0.42             |
| LC- $\omega$ PBE08-VV | 0.05             | 0.14             |
| M06                   | 0.02             | 0.20             |
| M06L                  | 0.05             | 0.21             |
| M06-HF                | 0.03             | 0.15             |
| BH&H                  | 0.08             | 0.15             |

## 7 RMSD analysis with hydrogens

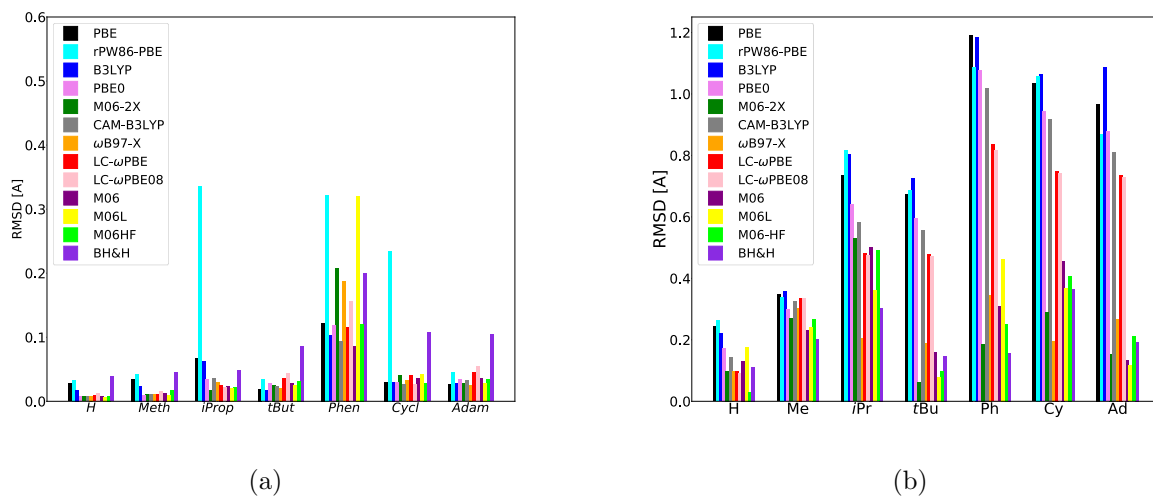

Figure S3: RMSD with hydrogens ( $\text{\AA}$ ) between DFAs and CC2 geometries for *trans* (left) and *cis* isomers (right), calculated using DFAs without dispersion corrections. RI-MP2 results are also shown for comparison.



Table S10: RMSD ( $\text{\AA}$ ) between geometries optimized using DFAs with and without dispersion corrections (in parenthesis) for  $E$  and  $Z$  isomers.

| Molecule               | Approx.                | RMSD ( $E$ ) | RMSD ( $Z$ ) |
|------------------------|------------------------|--------------|--------------|
| <b>a</b> (R = H)       | PBE(D3)                | 0.00         | 0.05         |
|                        | rPW86PBE (VV)          | 0.01         | 0.06         |
|                        | PBE0(D3)               | 0.00         | 0.05         |
|                        | B3LYP(D3)              | 0.00         | 0.07         |
|                        | M06-2X(D3)             | 0.00         | 0.00         |
|                        | CAM-B3LYP(D3)          | 0.00         | 0.05         |
|                        | LC- $\omega$ PBE(D3)   | 0.00         | 0.06         |
|                        | LC- $\omega$ PBE08(VV) | 0.01         | 0.01         |
|                        | $\omega$ B97X(D)       | 0.00         | 0.02         |
|                        | <b>b</b> (R = Me)      | PBE(D3)      | 0.00         |
| rPW86PBE(VV)           |                        | 0.01         | 0.08         |
| PBE0(D3)               |                        | 0.00         | 0.10         |
| B3LYP(D3)              |                        | 0.01         | 0.12         |
| M06-2X(D3)             |                        | 0.00         | 0.03         |
| CAM-B3LYP(D3)          |                        | 0.00         | 0.10         |
| LC- $\omega$ PBE(D3)   |                        | 0.00         | 0.12         |
| LC- $\omega$ PBE08(VV) |                        | 0.01         | 0.16         |
| $\omega$ B97X(D)       |                        | 0.00         | 0.06         |
| <b>c</b> (R = $i$ Pr)  |                        | PBE(D3)      | 0.01         |
|                        | rPW86PBE(VV)           | 0.03         | 0.73         |
|                        | PBE0(D3)               | 0.01         | 0.64         |
|                        | B3LYP(D3)              | 0.02         | 0.77         |
|                        | M06-2X(D3)             | 0.00         | 0.05         |
|                        | CAM-B3LYP(D3)          | 0.02         | 0.62         |
|                        | LC- $\omega$ PBE(D3)   | 0.02         | 0.65         |
|                        | LC- $\omega$ PBE08(VV) | 0.01         | 0.53         |
|                        | $\omega$ B97X(D)       | 0.00         | 0.15         |

| Molecule                   | Approx.                | RMSD ( <i>E</i> ) | RMSD ( <i>Z</i> ) |
|----------------------------|------------------------|-------------------|-------------------|
| <b>d</b> (R = <i>t</i> Bu) | PBE(D3)                | 0.01              | 0.53              |
|                            | rPW86PBE(VV)           | 0.02              | 0.59              |
|                            | PBE0(D3)               | 0.01              | 0.47              |
|                            | B3LYP(D3)              | 0.01              | 0.64              |
|                            | M06-2X(D3)             | 0.00              | 0.05              |
|                            | CAM-B3LYP(D3)          | 0.01              | 0.44              |
|                            | LC- $\omega$ PBE(D3)   | 0.01              | 0.49              |
|                            | LC- $\omega$ PBE08(VV) | 0.01              | 0.49              |
|                            | $\omega$ B97X(D)       | 0.01              | 0.23              |
|                            | <b>e</b> (R = Ph)      | PBE(D3)           | 0.03              |
| rPW86PBE(VV)               |                        | 0.02              | 0.74              |
| PBE0(D3)                   |                        | 0.03              | 0.88              |
| B3LYP(D3)                  |                        | 0.03              | 1.07              |
| M06-2X(D3)                 |                        | 0.04              | 0.05              |
| CAM-B3LYP(D3)              |                        | 0.03              | 0.89              |
| LC- $\omega$ PBE(D3)       |                        | 0.03              | 0.72              |
| LC- $\omega$ PBE08(VV)     |                        | 0.03              | 0.71              |
| $\omega$ B97X(D)           |                        | 0.03              | 0.22              |
| <b>f</b> (R = Cy)          |                        | PBE(D3)           | 0.03              |
|                            | rPW86PBE(VV)           | 0.03              | 1.08              |
|                            | PBE0(D3)               | 0.03              | 0.94              |
|                            | B3LYP(D3)              | 0.04              | 1.11              |
|                            | M06-2X(D3)             | 0.01              | 0.04              |
|                            | CAM-B3LYP(D3)          | 0.03              | 0.94              |
|                            | LC- $\omega$ PBE(D3)   | 0.03              | 0.81              |
|                            | LC- $\omega$ PBE08(VV) | 0.03              | 0.76              |
|                            | $\omega$ B97X(D)       | 0.01              | 0.18              |
|                            | <b>g</b> (R = Ad)      | PBE(D3)           | 0.02              |
| rPW86PBE(VV)               |                        | 0.02              | 1.15              |
| PBE0(D3)                   |                        | 0.02              | 0.79              |
| B3LYP(D3)                  |                        | 0.02              | 1.02              |
| M06-2X(D3)                 |                        | 0.00              | 0.07              |
| CAM-B3LYP(D3)              |                        | 0.02              | 0.69              |
| LC- $\omega$ PBE(D3)       |                        | 0.02              | 0.61              |
| LC- $\omega$ PBE08(VV)     |                        | 0.02              | 0.61              |
| $\omega$ B97X(D)           |                        | 0.01              | 0.27              |

Table S11: RMSD ( $\text{\AA}$ ) between DFAs and CC2 geometries for *E* and *Z* isomers, calculated using DFAs without and with dispersion corrections. RMSD between MP2 and CC2 geometries are also reported.

| Compound         | Approx.               | RMSD ( <i>E</i> ) | RMSD ( <i>Z</i> ) |
|------------------|-----------------------|-------------------|-------------------|
| <b>a</b> (R = H) | RI-MP2                | 0.02              | 0.02              |
|                  | PBE                   | 0.03              | 0.24              |
|                  | PBE-D3                | 0.03              | 0.20              |
|                  | rPW86PBE-VV           | 0.03              | 0.21              |
|                  | rPW86PBE              | 0.03              | 0.26              |
|                  | PBE0                  | 0.01              | 0.17              |
|                  | PBE0-D3               | 0.01              | 0.13              |
|                  | B3LYP                 | 0.02              | 0.22              |
|                  | B3LYP-D3              | 0.02              | 0.15              |
|                  | CAM-B3LYP             | 0.01              | 0.14              |
|                  | CAM-B3LYP-D3          | 0.01              | 0.10              |
|                  | LC- $\omega$ PBE      | 0.01              | 0.10              |
|                  | LC- $\omega$ PBE-D3   | 0.01              | 0.08              |
|                  | LC- $\omega$ PBE08    | 0.01              | 0.09              |
|                  | LC- $\omega$ PBE08-VV | 0.02              | 0.26              |
|                  | $\omega$ B97-X        | 0.01              | 0.10              |
|                  | $\omega$ B97-X-D      | 0.01              | 0.08              |
|                  | BH&H                  | 0.04              | 0.11              |
|                  | M06                   | 0.01              | 0.13              |
|                  | M06L                  | 0.01              | 0.18              |
| M06-2X           | 0.01                  | 0.10              |                   |
| M06-2X-D3        | 0.01                  | 0.09              |                   |
| M06-HF           | 0.01                  | 0.03              |                   |

| Compound                   | Approx.               | RMSD ( <i>E</i> ) | RMSD ( <i>Z</i> ) |
|----------------------------|-----------------------|-------------------|-------------------|
| <b>b</b> (R = Me)          | RI-MP2                | 0.03              | 0.08              |
|                            | PBE                   | 0.04              | 0.35              |
|                            | PBE-D3                | 0.03              | 0.27              |
|                            | rPW86PBE-VV           | 0.04              | 0.26              |
|                            | rPW86PBE              | 0.04              | 0.34              |
|                            | PBE0                  | 0.01              | 0.30              |
|                            | PBE0-D3               | 0.01              | 0.22              |
|                            | B3LYP                 | 0.02              | 0.36              |
|                            | B3LYP-D3              | 0.02              | 0.26              |
|                            | CAM-B3LYP             | 0.01              | 0.32              |
|                            | CAM-B3LYP-D3          | 0.01              | 0.28              |
|                            | LC- $\omega$ PBE      | 0.01              | 0.34              |
|                            | LC- $\omega$ PBE-D3   | 0.01              | 0.34              |
|                            | LC- $\omega$ PBE08    | 0.01              | 0.34              |
|                            | LC- $\omega$ PBE08-VV | 0.02              | 0.26              |
|                            | $\omega$ B97-X        | 0.01              | 0.30              |
|                            | $\omega$ B97-X-D      | 0.01              | 0.27              |
|                            | BH&H                  | 0.05              | 0.20              |
|                            | M06                   | 0.01              | 0.23              |
|                            | M06L                  | 0.01              | 0.24              |
| M06-2X                     | 0.01                  | 0.27              |                   |
| M06-2X-D3                  | 0.01                  | 0.26              |                   |
| M06-HF                     | 0.02                  | 0.27              |                   |
| <b>c</b> (R = <i>i</i> Pr) | RI-MP2                | 0.04              | 0.01              |
|                            | PBE                   | 0.07              | 0.74              |
|                            | PBE-D3                | 0.06              | 0.22              |
|                            | rPW86PBE-VV           | 0.32              | 0.26              |
|                            | rPW86PBE              | 0.34              | 0.68              |
|                            | PBE0                  | 0.03              | 0.64              |
|                            | PBE0-D3               | 0.02              | 0.20              |
|                            | B3LYP                 | 0.06              | 0.80              |
|                            | B3LYP-D3              | 0.04              | 0.19              |
|                            | CAM-B3LYP             | 0.04              | 0.58              |
|                            | CAM-B3LYP-D3          | 0.02              | 0.20              |
|                            | LC- $\omega$ PBE      | 0.03              | 0.48              |
|                            | LC- $\omega$ PBE-D3   | 0.01              | 0.38              |
|                            | LC- $\omega$ PBE08    | 0.02              | 0.47              |
|                            | LC- $\omega$ PBE08-VV | 0.02              | 0.14              |
|                            | $\omega$ B97-X        | 0.03              | 0.21              |
|                            | $\omega$ B97-X-D      | 0.03              | 0.14              |
|                            | BH&H                  | 0.05              | 0.30              |
|                            | M06                   | 0.02              | 0.50              |
|                            | M06L                  | 0.02              | 0.36              |
| M06-2X                     | 0.02                  | 0.53              |                   |
| M06-2X-D3                  | 0.02                  | 0.25              |                   |
| M06-HF                     | 0.02                  | 0.49              |                   |

| Compound                   | Approx.               | RMSD ( <i>E</i> ) | RMSD ( <i>Z</i> ) |
|----------------------------|-----------------------|-------------------|-------------------|
| <b>d</b> (R = <i>t</i> Bu) | RI-MP2                | 0.003             | 0.002             |
|                            | PBE                   | 0.02              | 0.67              |
|                            | PBE-D3                | 0.02              | 0.14              |
|                            | rPW86PBE-VV           | 0.02              | 0.11              |
|                            | rPW86PBE              | 0.03              | 0.69              |
|                            | PBE0                  | 0.03              | 0.60              |
|                            | PBE0-D3               | 0.03              | 0.12              |
|                            | B3LYP                 | 0.02              | 0.73              |
|                            | B3LYP-D3              | 0.01              | 0.10              |
|                            | CAM-B3LYP             | 0.02              | 0.56              |
|                            | CAM-B3LYP-D3          | 0.02              | 0.15              |
|                            | LC- $\omega$ PBE      | 0.04              | 0.48              |
|                            | LC- $\omega$ PBE-D3   | 0.04              | 0.09              |
|                            | LC- $\omega$ PBE08    | 0.04              | 0.47              |
|                            | LC- $\omega$ PBE08-VV | 0.05              | 0.09              |
|                            | $\omega$ B97-X        | 0.02              | 0.19              |
|                            | $\omega$ B97-X-D      | 0.02              | 0.09              |
|                            | BH&H                  | 0.09              | 0.15              |
|                            | M06                   | 0.03              | 0.16              |
|                            | M06L                  | 0.03              | 0.08              |
|                            | M06-2X                | 0.03              | 0.06              |
| M06-2X-D3                  | 0.03                  | 0.04              |                   |
| M06-HF                     | 0.03                  | 0.10              |                   |
| <b>e</b> (R = Ph)          | RI-MP2                | 0.01              | 0.03              |
|                            | PBE                   | 0.12              | 1.19              |
|                            | PBE-D3                | 0.14              | 0.24              |
|                            | rPW86PBE-VV           | 0.32              | 0.48              |
|                            | rPW86PBE              | 0.32              | 1.09              |
|                            | PBE0                  | 0.12              | 1.08              |
|                            | PBE0-D3               | 0.14              | 0.21              |
|                            | B3LYP                 | 0.10              | 1.18              |
|                            | B3LYP-D3              | 0.12              | 0.15              |
|                            | CAM-B3LYP             | 0.09              | 1.02              |
|                            | CAM-B3LYP-D3          | 0.12              | 0.21              |
|                            | LC- $\omega$ PBE      | 0.12              | 0.84              |
|                            | LC- $\omega$ PBE-D3   | 0.14              | 0.15              |
|                            | LC- $\omega$ PBE08    | 0.15              | 0.81              |
|                            | LC- $\omega$ PBE08-VV | 0.16              | 0.13              |
|                            | $\omega$ B97-X        | 0.19              | 0.35              |
|                            | $\omega$ B97-X-D      | 0.20              | 0.14              |
|                            | BH&H                  | 0.20              | 0.16              |
|                            | M06                   | 0.09              | 0.31              |
|                            | M06L                  | 0.32              | 0.46              |
|                            | M06-2X                | 0.21              | 0.19              |
| M06-2X-D3                  | 0.17                  | 0.14              |                   |
| M06-HF                     | 0.12                  | 0.25              |                   |

| Compound          | Approx.               | RMSD ( $E$ ) | RMSD ( $Z$ ) |
|-------------------|-----------------------|--------------|--------------|
| <b>f</b> (R = Cy) | RI-MP2                | 0.04         | 0.01         |
|                   | PBE                   | 0.03         | 1.03         |
|                   | PBE-D3                | 0.03         | 0.20         |
|                   | rPW86PBE-VV           | 0.22         | 0.13         |
|                   | rPW86PBE              | 0.23         | 1.06         |
|                   | PBE0                  | 0.03         | 0.94         |
|                   | PBE0-D3               | 0.04         | 0.16         |
|                   | B3LYP                 | 0.03         | 1.06         |
|                   | B3LYP-D3              | 0.03         | 0.16         |
|                   | CAM-B3LYP             | 0.03         | 0.92         |
|                   | CAM-B3LYP-D3          | 0.04         | 0.18         |
|                   | LC- $\omega$ PBE      | 0.04         | 0.75         |
|                   | LC- $\omega$ PBE-D3   | 0.06         | 0.15         |
|                   | LC- $\omega$ PBE08    | 0.03         | 0.74         |
|                   | LC- $\omega$ PBE08-VV | 0.05         | 0.13         |
|                   | $\omega$ B97-X        | 0.03         | 0.20         |
|                   | $\omega$ B97-X-D      | 0.04         | 0.24         |
|                   | BH&H                  | 0.11         | 0.36         |
|                   | M06                   | 0.04         | 0.46         |
|                   | M06L                  | 0.04         | 0.37         |
|                   | M06-2X                | 0.04         | 0.29         |
|                   | M06-2X-D3             | 0.05         | 0.29         |
| M06-HF            | 0.03                  | 0.41         |              |
| <b>g</b> (R = Ad) | RI-MP2                | 0.02         | 0.03         |
|                   | PBE                   | 0.03         | 0.97         |
|                   | PBE-D3                | 0.02         | 0.43         |
|                   | rPw86PBE-VV           | 0.04         | 0.27         |
|                   | rPw86PBE              | 0.05         | 0.87         |
|                   | PBE0                  | 0.03         | 0.88         |
|                   | PBE0-D3               | 0.03         | 0.43         |
|                   | B3LYP                 | 0.03         | 1.09         |
|                   | B3LYP-D3              | 0.02         | 0.42         |
|                   | CAM-B3LYP             | 0.03         | 0.81         |
|                   | CAM-B3LYP-D3          | 0.03         | 0.43         |
|                   | LC- $\omega$ PBE      | 0.04         | 0.74         |
|                   | LC- $\omega$ PBE-D3   | 0.04         | 0.42         |
|                   | LC- $\omega$ PBE08    | 0.06         | 0.73         |
|                   | LC- $\omega$ PBE08-VV | 0.06         | 0.44         |
|                   | wB97-X                | 0.03         | 0.27         |
|                   | wB97-X-D              | 0.02         | 0.06         |
|                   | BH&H                  | 0.10         | 0.19         |
|                   | M06                   | 0.04         | 0.13         |
|                   | M06L                  | 0.03         | 0.12         |
|                   | M06-2X                | 0.03         | 0.15         |
|                   | M06-2X-D3             | 0.03         | 0.10         |
| M06-HF            | S-22<br>0.03          | 0.21         |              |

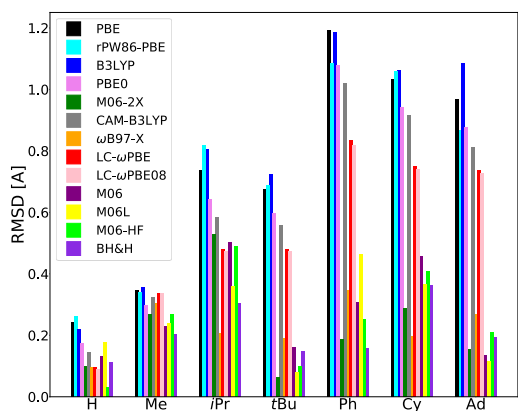

(a)

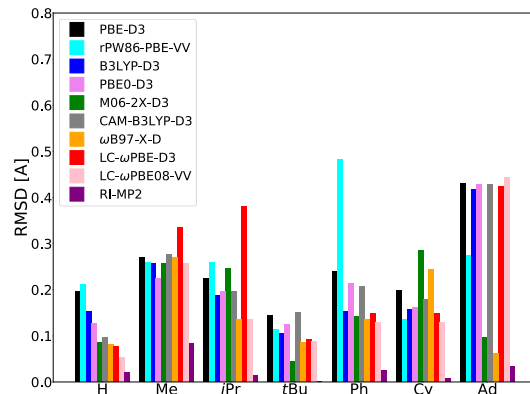

(b)

Figure S4: RMSD between DFAs and CC2 geometries for *cis* isomers, calculated using DFAs without (left) and with (right) dispersion corrections. RI-MP2 results are also shown for comparison.

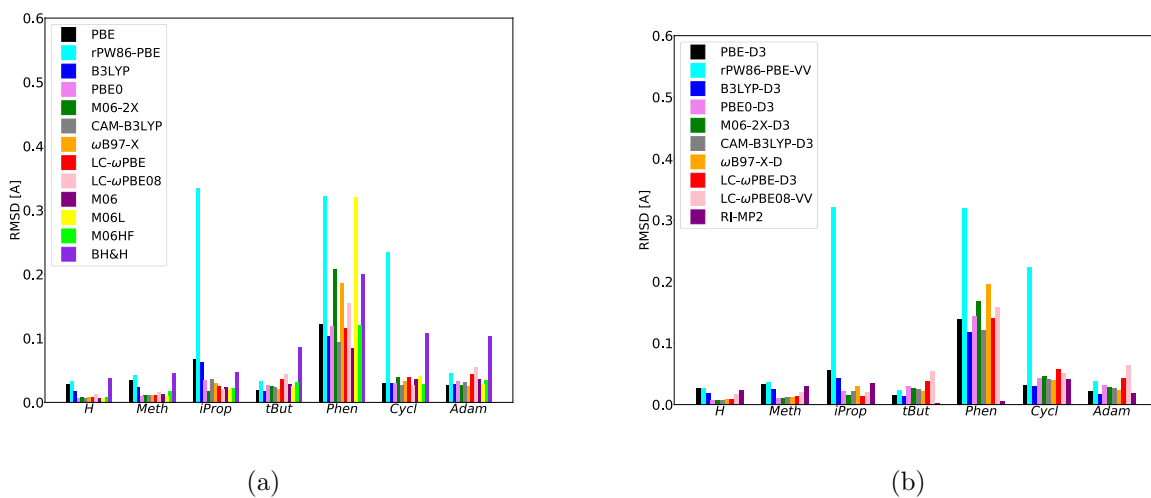

Figure S5: RMSD between DFAs and CC2 geometries for *trans* isomers, calculated using DFAs without (left) and with (right) dispersion corrections. RI-MP2 results are also shown for comparison.

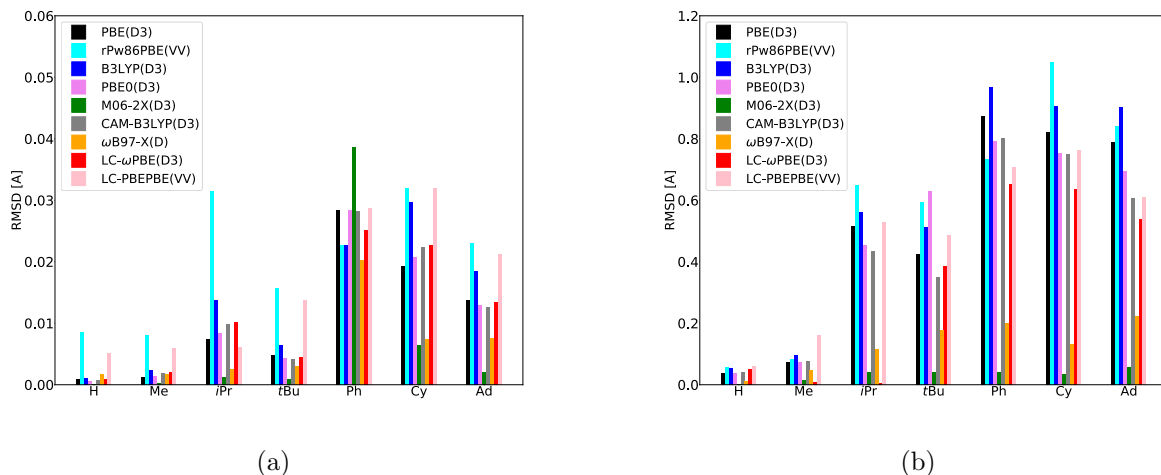

Figure S6: RMSD (Å) excluding hydrogen atoms between geometries optimized using DFAs with and without dispersion corrections for *trans* (left) and *cis* (right) isomers.



## 8 Relative *Z-E* energies

### 8.1 CC2 *vs* MP2

Table S12: Difference in the energy of the *trans* (E) and *cis* (Z) forms,  $\Delta E_{EZ} = E_Z - E_E$ , as calculated at the HF, RI-CC2 and RI-MP2 levels with the cc-pVDZ basis set. All energy values are in kcal.mol<sup>-1</sup>.

| Molecule                   | Approx. | $\Delta E_{EZ}$ |
|----------------------------|---------|-----------------|
| <b>a</b> (R = H)           | RI-CC2  | 11.46           |
|                            | RI-MP2  | 12.01           |
|                            | HF      | 17.9            |
| <b>b</b> (R = Me)          | RI-CC2  | 10.87           |
|                            | RI-MP2  | 11.43           |
|                            | HF      | 17.4            |
| <b>c</b> (R = <i>i</i> Pr) | RI-CC2  | 8.06            |
|                            | RI-MP2  | 8.90            |
|                            | HF      | 17.5            |
| <b>d</b> (R = <i>t</i> Bu) | RI-CC2  | 6.73            |
|                            | RI-MP2  | 7.70            |
|                            | HF      | 17.7            |
| <b>e</b> (R = Ph)          | RI-CC2  | 4.04            |
|                            | RI-MP2  | 4.9             |
|                            | HF      | 17.4            |
| <b>f</b> (R = Cy)          | RI-CC2  | 5.16            |
|                            | RI-MP2  | 6.41            |
|                            | HF      | 17.3            |
| <b>g</b> (R = Ad)          | RI-CC2  | 0.80            |
|                            | RI-MP2  | 2.67            |
|                            | HF      | 17.4            |

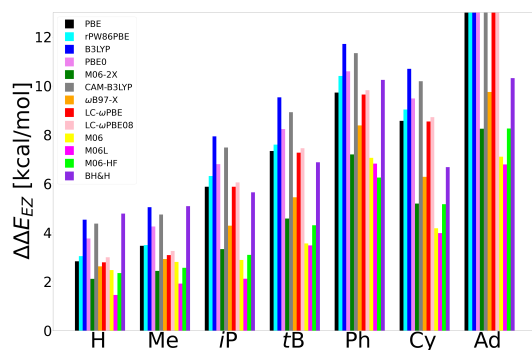

(a)

Figure S7:  $Z$ - $E$  energy differences calculated at the CC2 level and DFAs without dispersion corrections ( $\Delta\Delta E_{ZE} = \Delta E_{ZE}(DFT) - \Delta E_{ZE}(CC2)$ , in kcal/mol).

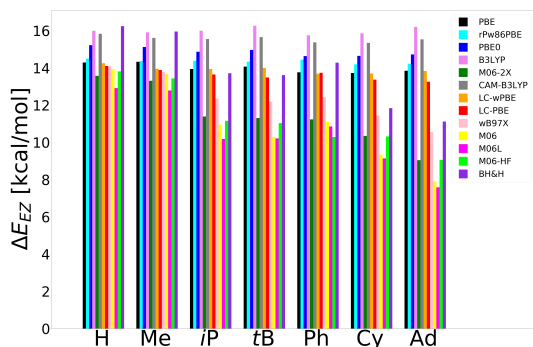

(a)

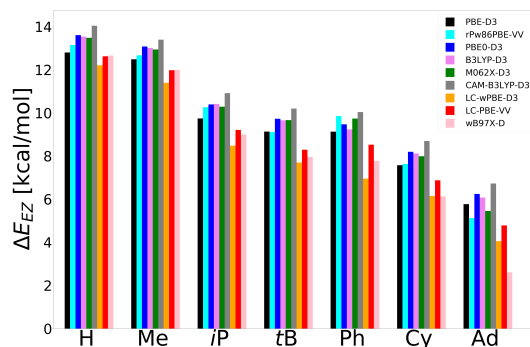

(b)

Figure S8: Difference in the energy of the *trans* ( $E$ ) and *cis* ( $Z$ ) forms,  $\Delta E_{EZ} = E_Z - E_E$ , as calculated using DFAs without (left) and with (right) dispersion corrections and the cc-pVDZ basis set.

## 8.2 DFT relative *Z-E* energies

Table S13: Relative electronic energies of the E and Z conformers,  $\Delta E_{ZE} = E_E - E_Z$ , and relative Gibbs free energies ( $\Delta G_{ZE} = G_E - G_Z$ ), calculated at T = 300 K and P = 1 atm. All calculations were done using the cc-pVDZ basis set. All energy values are in kcal.mol<sup>-1</sup>. The Gibbs free energy have been calculated for the functionals implemented in Gaussian using the quasi-harmonic approximation (qa-G) employing the software goodvibes.py.<sup>S15</sup> The vibrational entropy was tested using the Grimme scheme,<sup>S16</sup> while the enthalpy contributions were evaluated with the Head-Gordon scheme.<sup>S17</sup> The threshold for which the qa-G was employed is 100 cm<sup>-1</sup>. For the functionals calculated with Q-Chem (namely, rPW86-PBE, rPW86-PBE-VV, LC- $\omega$ PBE08 and LC- $\omega$ PBE08-VV) frequency calculations do not have been performed because analytical calculations are not implemented, and therefore free energies are not available. For RI-CC2 and RI-MP2 the Gibbs free energies correspond to normal computations.

| Compound         | Approx.               | $\Delta E_{ZE}$ | $\Delta G_{ZE}$ |
|------------------|-----------------------|-----------------|-----------------|
| <b>a</b> (R = H) | RI-CC2                | -11.5           | -11.6           |
|                  | RI-MP2                | -12.0           | -12.3           |
|                  | PBE                   | -14.3           | -13.6           |
|                  | PBE-D3                | -12.8           | -12.2           |
|                  | PBE0                  | -15.2           | -14.7           |
|                  | PBE0-D3               | -13.6           | -13.1           |
|                  | rPW86-PBE             | -14.5           |                 |
|                  | rPW86-PBE-VV          | -13.1           |                 |
|                  | B3LYP                 | -16.0           | -15.4           |
|                  | B3LYP-D3              | -13.5           | -13.0           |
|                  | BH&H                  | -16.2           | -15.7           |
|                  | CAM-B3LYP             | -15.8           | -15.3           |
|                  | CAM-B3LYP-D3          | -14.0           | -13.6           |
|                  | $\omega$ B97-X        | -14.1           | -13.7           |
|                  | $\omega$ B97-X-D      | -12.7           | -12.4           |
|                  | LC- $\omega$ PBE      | -14.2           | -14.0           |
|                  | LC- $\omega$ PBE-D3   | -12.2           | -12.1           |
|                  | LC- $\omega$ PBE08    | -14.5           |                 |
|                  | LC- $\omega$ PBE08-VV | -12.8           |                 |
|                  | M06                   | -13.9           | -13.5           |
|                  | M06L                  | -12.9           | -12.4           |
|                  | M06-2X                | -13.6           | -13.1           |
|                  | M06-2X-D3             | -13.5           | -12.8           |
|                  | M06-HF                | -13.8           | -13.4           |
|                  | HF                    | -17.9           | -17.5           |

| Compound          | Approx.               | $\Delta E_{ZE}$ | $\Delta G_{ZE}$ |
|-------------------|-----------------------|-----------------|-----------------|
| <b>b</b> (R = Me) | RI-CC2                | -10.9           | -11.4           |
|                   | RI-MP2                | -11.4           | -12.1           |
|                   | PBE                   | -14.3           | -13.5           |
|                   | PBE-D3                | -12.5           | -11.9           |
|                   | PBE0                  | -15.1           | -14.7           |
|                   | PBE0-D3               | -13.1           | -12.7           |
|                   | rPW86-PBE             | -14.4           |                 |
|                   | rPW86-PBE-VV          | -12.7           |                 |
|                   | B3LYP                 | -15.9           | -15.4           |
|                   | B3LYP-D3              | -13.0           | -12.7           |
|                   | BH&H                  | -16.0           | -15.2           |
|                   | CAM-B3LYP             | -15.6           | -15.3           |
|                   | CAM-B3LYP-D3          | -13.4           | -13.2           |
|                   | $\omega$ B97-X        | -13.8           | -13.7           |
|                   | $\omega$ B97-X-D      | -12.0           | -11.4           |
|                   | LC- $\omega$ PBE      | -14.0           | -14.0           |
|                   | LC- $\omega$ PBE-D3   | -11.4           | -11.5           |
|                   | LC- $\omega$ PBE08    | -14.1           |                 |
|                   | LC- $\omega$ PBE08-VV | -12.1           |                 |
|                   | M06                   | -13.6           | -13.8           |
|                   | M06L                  | -12.8           | -12.3           |
|                   | M06-2X                | -13.3           | -13.7           |
|                   | M06-2X-D3             | -12.9           | -13.2           |
|                   | M06-HF                | -13.4           | -13.9           |
|                   | HF                    | -17.4           | -17.2           |

| Compound                   | Approx.               | $\Delta E_{ZE}$ | $\Delta G_{ZE}$ |
|----------------------------|-----------------------|-----------------|-----------------|
| <b>c</b> (R = <i>i</i> Pr) | RI-CC2                | -8.1            | -8.4            |
|                            | RI-MP2                | -8.9            | -9.5            |
|                            | PBE                   | -13.9           | -14.1           |
|                            | PBE-D3                | -9.7            | -10.5           |
|                            | PBE0                  | -14.9           | -15.1           |
|                            | PBE0-D3               | -10.4           | -11.1           |
|                            | rPW86-PBE             | -14.4           |                 |
|                            | rPW86-PBE-VV          | -10.3           |                 |
|                            | B3LYP                 | -16.0           | -16.1           |
|                            | B3LYP-D3              | -10.4           | -11.5           |
|                            | BH&H                  | -13.7           | -14.5           |
|                            | CAM-B3LYP             | -15.5           | -15.7           |
|                            | CAM-B3LYP-D3          | -10.9           | -11.8           |
|                            | $\omega$ B97-X        | -12.3           | -13.6           |
|                            | $\omega$ B97-X-D      | -9.0            | -10.1           |
|                            | LC- $\omega$ PBE      | -13.9           | -14.6           |
|                            | LC- $\omega$ PBE-D3   | -8.5            | -10.2           |
|                            | LC- $\omega$ PBE08    | -14.1           |                 |
|                            | LC- $\omega$ PBE08-VV | -9.2            |                 |
|                            | M06                   | -11.0           | -13.0           |
|                            | M06L                  | -10.2           | -11.3           |
|                            | M06-2X                | -11.4           | -12.6           |
|                            | M06-2X-D3             | -10.3           | -11.4           |
|                            | M06-HF                | -11.2           | -14.0           |
| HF                         | -17.5                 | -17.7           |                 |

| Compound                   | Approx.               | $\Delta E_{ZE}$ | $\Delta G_{ZE}$ |
|----------------------------|-----------------------|-----------------|-----------------|
| <b>d</b> (R = <i>t</i> Bu) | RI-CC2                | -6.7            | -7.5            |
|                            | RI-MP2                | -7.7            | -8.6            |
|                            | PBE                   | -14.1           | -13.9           |
|                            | PBE-D3                | -9.1            | -9.5            |
|                            | PBE0                  | -15.0           | -15.0           |
|                            | PBE0-D3               | -9.7            | -10.3           |
|                            | rPW86-PBE             | -14.3           |                 |
|                            | rPW86-PBE-VV          | -9.1            |                 |
|                            | B3LYP                 | -16.3           | -16.2           |
|                            | B3LYP-D3              | -9.7            | -10.5           |
|                            | BH&H                  | -13.6           | -14.2           |
|                            | CAM-B3LYP             | -15.7           | -15.8           |
|                            | CAM-B3LYP-D3          | -10.2           | -11.0           |
|                            | $\omega$ B97-X        | -12.2           | -13.0           |
|                            | $\omega$ B97-X-D      | -8.0            | -9.9            |
|                            | LC- $\omega$ PBE      | -14.0           | -14.4           |
|                            | LC- $\omega$ PBE-D3   | -7.7            | -8.8            |
|                            | LC- $\omega$ PBE08    | -14.2           |                 |
|                            | LC- $\omega$ PBE08-VV | -8.2            |                 |
|                            | M06                   | -10.3           | -11.5           |
|                            | M06L                  | -10.2           | -11.6           |
|                            | M06-2X                | -11.3           | -11.9           |
|                            | M06-2X-D3             | -9.7            | -10.2           |
|                            | M06-HF                | -11.0           | -11.6           |
|                            | HF                    | -17.7           | -18.0           |

| Compound   | Approx.               | $\Delta E_{ZE}$ | $\Delta G_{ZE}$ |
|------------|-----------------------|-----------------|-----------------|
| e (R = Ph) | RI-CC2                | -4.0            | -5.9            |
|            | RI-MP2                | -4.9            | -7.0            |
|            | PBE                   | -13.8           | -13.3           |
|            | PBE-D3                | -9.1            | -9.3            |
|            | PBE0                  | -14.6           | -14.3           |
|            | PBE0-D3               | -9.5            | -9.7            |
|            | rPW86-PBE             | -14.4           |                 |
|            | rPW86-PBE-VV          | -9.9            |                 |
|            | B3LYP                 | -15.8           | -15.3           |
|            | B3LYP-D3              | -9.2            | -10.0           |
|            | BH&H                  | -14.3           | -14.4           |
|            | CAM-B3LYP             | -15.4           | -15.0           |
|            | CAM-B3LYP-D3          | -10.0           | -10.7           |
|            | $\omega$ B97-X        | -12.4           | -12.4           |
|            | $\omega$ B97-X-D      | -7.8            | -8.5            |
|            | LC- $\omega$ PBE      | -13.7           | -13.5           |
|            | LC- $\omega$ PBE-D3   | -7.0            | -8.0            |
|            | LC- $\omega$ PBE08    | -13.9           |                 |
|            | LC- $\omega$ PBE08-VV | -7.9            |                 |
|            | M06                   | -11.1           | -11.6           |
|            | M06L                  | -10.9           | -10.9           |
|            | M06-2X                | -11.2           | -11.0           |
|            | M06-2X-D3             | -9.7            | -9.9            |
|            | M06-HF                | -10.3           | -10.5           |
|            | HF                    | -17.4           | -17.2           |

| Compound          | Approx.               | $\Delta E_{ZE}$ | $\Delta G_{ZE}$ |
|-------------------|-----------------------|-----------------|-----------------|
| <b>f</b> (R = Cy) | RI-CC2                | -5.2            | -5.5            |
|                   | RI-MP2                | -6.4            | -7.0            |
|                   | PBE                   | -13.7           | -13.5           |
|                   | PBE-D3                | -7.6            | -8.6            |
|                   | PBE0                  | -14.6           | -14.4           |
|                   | PBE0-D3               | -8.2            | -9.4            |
|                   | rPW86-PBE             | -14.2           |                 |
|                   | rPW86-PBE-VV          | -7.6            |                 |
|                   | B3LYP                 | -15.9           | -15.8           |
|                   | B3LYP-D3              | -8.1            | -9.7            |
|                   | BH&H                  | -11.8           | -13.2           |
|                   | CAM-B3LYP             | -15.3           | -15.3           |
|                   | CAM-B3LYP-D3          | -8.7            | -10.3           |
|                   | $\omega$ B97-X        | -11.4           | -12.5           |
|                   | $\omega$ B97-X-D      | -6.1            | -8.2            |
|                   | LC- $\omega$ PBE      | -13.7           | -13.8           |
|                   | LC- $\omega$ PBE-D3   | -6.1            | -7.9            |
|                   | LC- $\omega$ PBE08    | -13.9           |                 |
|                   | LC- $\omega$ PBE08-VV | -6.8            |                 |
|                   | M06                   | -9.3            | -10.1           |
|                   | M06L                  | -9.1            | 9.0             |
|                   | M06-2X                | -10.3           | -11.5           |
|                   | M06-2X-D3             | -8.0            | -9.5            |
|                   | M06-HF                | -10.3           | -12.2           |
|                   | HF                    | -17.3           | -17.5           |



| Compound          | Approx.               | $\Delta E_{ZE}$ | $\Delta G_{ZE}$ |
|-------------------|-----------------------|-----------------|-----------------|
| <b>g</b> (R = Ad) | RI-CC2                | -0.8            |                 |
|                   | RI-MP2                | -2.7            | -4.9            |
|                   | PBE                   | -13.8           | -13.7           |
|                   | PBE-D3                | -5.8            | -6.9            |
|                   | PBE0                  | -14.7           | -14.5           |
|                   | PBE0-D3               | -6.2            | -7.5            |
|                   | rPW86-PBE             | -14.2           |                 |
|                   | rPW86-PBE-VV          | -5.1            |                 |
|                   | B3LYP                 | -16.2           | -15.7           |
|                   | B3LYP-D3              | -6.1            | -7.7            |
|                   | BH&H                  | -11.1           | -12.4           |
|                   | CAM-B3LYP             | -15.5           | -14.7           |
|                   | CAM-B3LYP-D3          | -6.7            | -8.3            |
|                   | $\omega$ B97-X        | -10.6           | -12.1           |
|                   | $\omega$ B97-X-D      | -2.6            | -3.7            |
|                   | LC- $\omega$ PBE      | -13.8           | -13.9           |
|                   | LC- $\omega$ PBE-D3   | -4.1            | -6.2            |
|                   | LC- $\omega$ PBE08    | -14.0           |                 |
|                   | LC- $\omega$ PBE08-VV | -4.2            |                 |
|                   | M06                   | -7.9            | 8.2             |
|                   | M06L                  | -7.6            | -9.1            |
|                   | M06-2X                | -9.0            | -10.4           |
|                   | M06-2X-D3             | -5.5            | -6.8            |
|                   | M06-HF                | -9.1            | -10.4           |
|                   | HF                    | -17.4           | -17.8           |

## 9 Calculations for the Ph molecule

DFA with dispersion corrections are able to reproduce qualitatively well the energy gap of all the systems considered. However, we observed that are much less accurate for the compound **f**, which includes phenyl substituents in the *meso* position. In order to investigate these discrepancies, we performed single-point calculations on the RI-CC2 geometries for this molecule. The results are collected in Table S14 and Fig. S9.

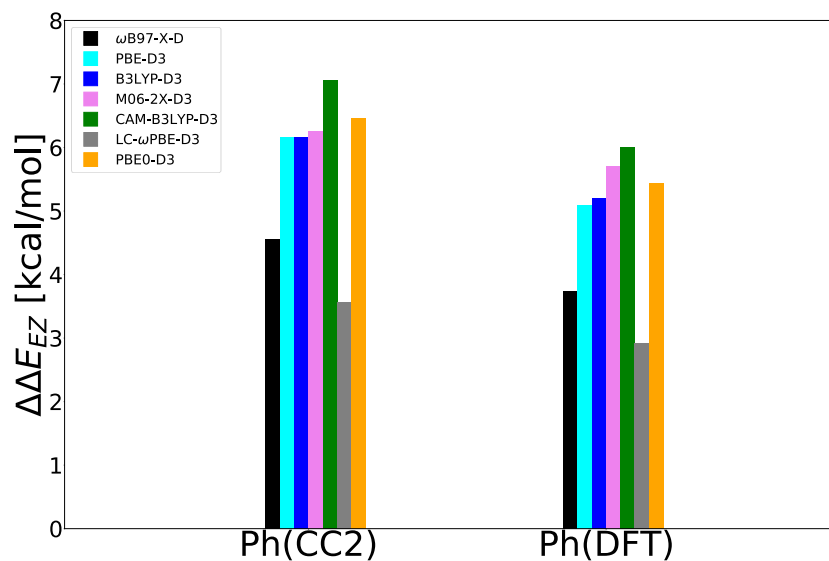

Figure S9:  $Z - E$  energy differences with respect to RI-CC2 issued from DFAs for the molecule with  $R = \text{Ph}$ , using reference RI-CC2 geometries (left) and optimized DFA geometries (right) with dispersion corrections ( $\Delta\Delta E_{ZE} = \Delta E_{ZE}^{DFT}(DFT/CC2) - \Delta E_{ZE}^{CC2}(CC2)$ , in kcal/mol).

Table S14:  $Z - E$  energy differences issued from RI-CC2 and DFAs for the molecule with  $R = \text{Ph}$ , using reference RI-CC2 geometries (left) and optimized DFAs' geometries (right) with dispersion corrections (in kcal/mol).

| Compound | Approx.             | $\Delta E_{EZ}(RI - CC2)$ | $\Delta E_{EZ}(DFT)$ |
|----------|---------------------|---------------------------|----------------------|
| Ph       | RI-CC2              | -4.0                      | -                    |
|          | $\omega$ B97-X-D    | -8.6                      | -7.8                 |
|          | PBE-D3              | -10.2                     | -9.1                 |
|          | PBE0-D3             | -10.5                     | -9.5                 |
|          | B3LYP-D3            | -10.2                     | -9.2                 |
|          | M06-2X-D3           | -10.3                     | -9.7                 |
|          | CAM-B3LYP-D3        | -11.1                     | -10.0                |
|          | LC- $\omega$ PBE-D3 | -7.6                      | -6.9                 |

## 10 Nonlinear Optical properties

### 10.1 Reference RI-MP2 results

The accuracy of the RI approximation in the evaluation of  $\beta$  has been tested for the molecule  $R=\text{H}$ , with respect to the standard MP2 calculation.

| Molecule | $\beta_{MP2}$ | $\beta_{RI-MP2}$ |
|----------|---------------|------------------|
| R= H     | 52.55         | 52.52            |

## 10.2 *ab initio* results

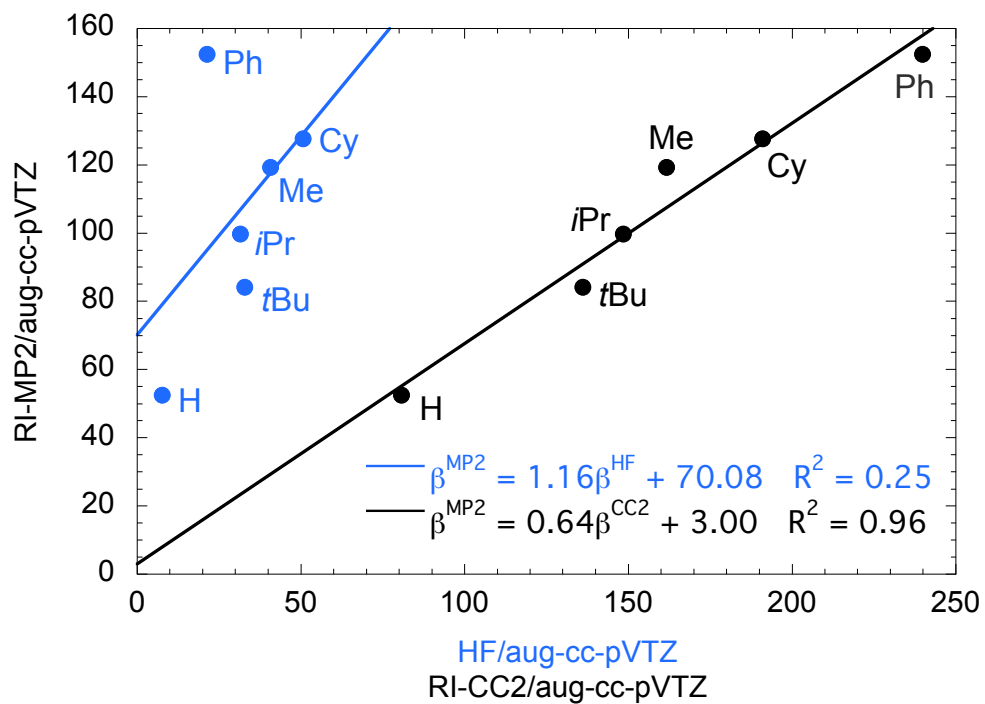

Figure S10: Correlation between static hyperpolarizabilities (a.u.) of the series of azobenzenes calculated at the MP2 level with respect to the values calculated using CC2 and HF.

### 10.3 DFT results

Table S15: Total first hyperpolarizabilities ( $\beta$ , a.u.) of the *cis* isomers, calculated using various levels of approximation with the aug-cc-pVTZ basis set, using RI-CC2/cc-pVDZ geometries.

| Compound          | Approx.             | $\beta$ |
|-------------------|---------------------|---------|
| <b>a</b> (R = H)  | RI-MP2              | 52.5    |
|                   | RI-CC2              | 80.8    |
|                   | PBE                 | 99.6    |
|                   | rPW86-PBE           | 107.2   |
|                   | rPW86-PBE-VV        | 104.0   |
|                   | PBE0                | 73.1    |
|                   | B3LYP               | 83.3    |
|                   | BH&H                | 41.1    |
|                   | CAM-B3LYP           | 52.4    |
|                   | $\omega$ B97X       | 44.0    |
|                   | $\omega$ B97X-D     | 61.5    |
|                   | LC-BLYP             | 22.2    |
|                   | T $\alpha$ -LC-BLYP | 44.3    |
|                   | LC-PBE              | 23.6    |
|                   | LC- $\omega$ PBE    | 31.2    |
|                   | LC-PBE-VV           | 42.5    |
|                   | M06                 | 96.8    |
|                   | M06L                | 136.3   |
|                   | M06-2X              | 43.8    |
|                   | M06-HF              | 1.5     |
| HF                | 7.7                 |         |
| <b>b</b> (R = Me) | RI-MP2              | 119.3   |
|                   | RI-CC2              | 161.7   |
|                   | PBE                 | 186.6   |
|                   | rPW86-PBE           | 196.4   |
|                   | rPW86-PBE-VV        | 200.4   |
|                   | PBE0                | 142.8   |
|                   | B3LYP               | 155.8   |
|                   | BH&H                | 99.3    |
|                   | CAM-B3LYP           | 115.4   |
|                   | $\omega$ B97X       | 107.2   |
|                   | $\omega$ B97X-D     | 132.0   |
|                   | LC-BLYP             | 75.6    |
|                   | T $\alpha$ -LC-BLYP | 109.6   |
|                   | LC-PBE              | 76.6    |
|                   | LC- $\omega$ PBE    | 87.5    |
|                   | LC-PBE-VV           | 85.5    |
|                   | M06                 | 166.0   |
|                   | M06L                | 227.1   |
|                   | M06-2X              | 100.0   |
|                   | M06-HF              | 46.7    |
| HF                | 40.7                |         |

| Compound                   | Approx.             | $\beta$ |
|----------------------------|---------------------|---------|
| <b>c</b> (R = <i>i</i> Pr) | RI-MP2              | 99.8    |
|                            | RI-CC2              | 148.5   |
|                            | PBE                 | 176.1   |
|                            | rPW86-PBE           | 183.9   |
|                            | rPW86-PBE-VV        | 186.0   |
|                            | PBE0                | 117.3   |
|                            | B3LYP               | 132.7   |
|                            | BH&H                | 71.6    |
|                            | CAM-B3LYP           | 92.7    |
|                            | $\omega$ B97X       | 76.8    |
|                            | $\omega$ B97X-D     | 95.4    |
|                            | LC-BLYP             | 56.7    |
|                            | T $\alpha$ -LC-BLYP | 86.1    |
|                            | LC-PBE              | 55.3    |
|                            | LC- $\omega$ PBE    | 66.9    |
|                            | LC-PBE-VV           | 58.9    |
|                            | M06                 | 150.4   |
|                            | M06L                | 196.5   |
|                            | M06-2X              | 84.8    |
|                            | M06-HF              | 46.3    |
| HF                         | 31.6                |         |
| <b>d</b> (R = <i>t</i> Bu) | RI-MP2              | 84.1    |
|                            | RI-CC2              | 136.1   |
|                            | PBE                 | 179.2   |
|                            | rPW86-PBE           | 188.2   |
|                            | rPW86-PBE-VV        | 187.5   |
|                            | PBE0                | 115.5   |
|                            | B3LYP               | 130.8   |
|                            | BH&H                | 68.3    |
|                            | CAM-B3LYP           | 91.3    |
|                            | $\omega$ B97X       | 83.2    |
|                            | $\omega$ B97X-D     | 107.1   |
|                            | LC-BLYP             | 58.4    |
|                            | T $\alpha$ -LC-BLYP | 84.9    |
|                            | LC-PBE              | 56.4    |
|                            | LC- $\omega$ PBE    | 67.5    |
|                            | LC-PBE-VV           | 70.4    |
|                            | M06                 | 159.5   |
|                            | M06L                | 218.0   |
|                            | M06-2X              | 81.6    |
|                            | M06-HF              | 41.6    |
| HF                         | 32.9                |         |

| Compound          | Approx.             | $\beta$ |
|-------------------|---------------------|---------|
| <b>e</b> (R = Ph) | RI-MP2              | 152.4   |
|                   | RI-CC2              | 239.8   |
|                   | PBE                 | 266.2   |
|                   | rPW86-PBE           | 253.3   |
|                   | rPW86-PBE-VV        | 294.2   |
|                   | PBE0                | 158.3   |
|                   | B3LYP               | 174.7   |
|                   | BH&H                | 100.2   |
|                   | CAM-B3LYP           | 99.7    |
|                   | $\omega$ B97X       | 84.4    |
|                   | $\omega$ B97X-D     | 107.6   |
|                   | LC-BLYP             | 53.9    |
|                   | T $\alpha$ -LC-BLYP | 85.0    |
|                   | LC-PBE              | 59.5    |
|                   | LC- $\omega$ PBE    | 66.7    |
|                   | LC-PBE-VV           | 72.8    |
|                   | M06                 | 207.8   |
|                   | M06L                | 277.9   |
|                   | M06-2X              | 115.9   |
|                   | M06-HF              | 36.4    |
| HF                | 21.3                |         |
| <b>f</b> (R = Cy) | RI-MP2              | 127.7   |
|                   | RI-CC2              | 191.0   |
|                   | PBE                 | 294.3   |
|                   | rPW86-PBE           | 348     |
|                   | rPW86-PBE-VV        | 253.7   |
|                   | PBE0                | 158.0   |
|                   | B3LYP               | 175.3   |
|                   | BH&H                | 97.8    |
|                   | CAM-B3LYP           | 119.2   |
|                   | $\omega$ B97X       | 105.1   |
|                   | $\omega$ B97X-D     | 131.0   |
|                   | LC-BLYP             | 75.7    |
|                   | T $\alpha$ -LC-BLYP | 107.2   |
|                   | LC-PBE              | 75.7    |
|                   | LC- $\omega$ PBE    | 88.4    |
|                   | LC-PBE-VV           | 79.3    |
|                   | M06                 | 202.3   |
|                   | M06L                | 263.4   |
|                   | M06-2X              | 111.6   |
|                   | M06-HF              | 59.1    |
| HF                | 50.1                |         |

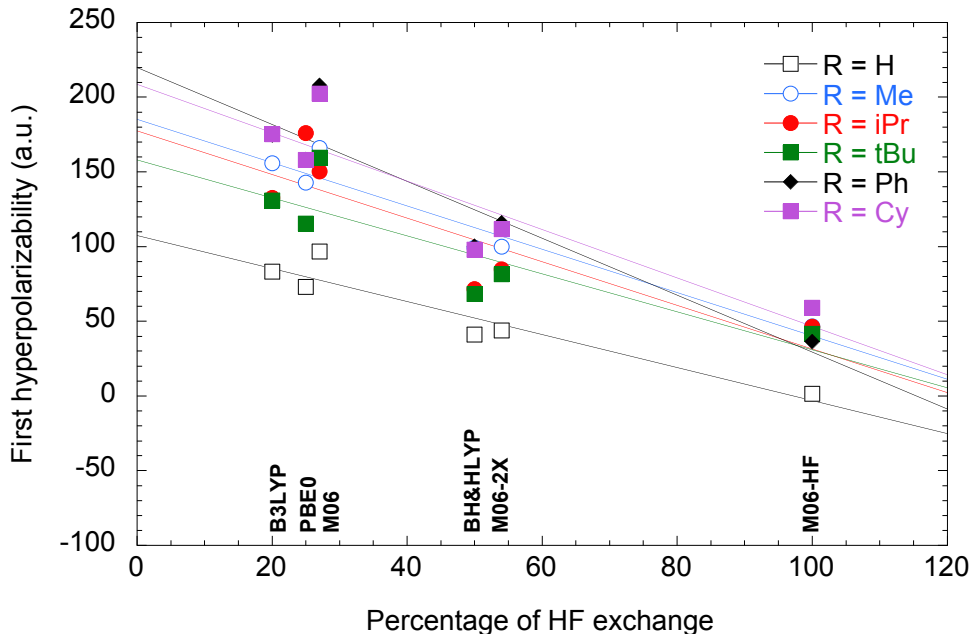

Figure S11: Evolution of the static hyperpolarizabilities (a.u.) of the series of azobenzenes calculated using various DFAs in combination with the aug-cc-pVTZ basis set, as a function of the percentage of exact Hartree-Fock exchange.

Table S16: Absolute errors relative to MP2 ( $AE(\%) = |\beta_{DFT} - \beta_{MP2}|/\beta_{MP2} \times 100$ ) on the total first hyperpolarizabilities of *cis* isomers, as calculated for selected hybrid functionals.

| DFA      | R = H  | R = Me | R = <i>i</i> Pr | R = <i>t</i> Bu | R = Ph | R = Cy | Mean AE |
|----------|--------|--------|-----------------|-----------------|--------|--------|---------|
| PBE0     | 52.4   | 38.7   | 43.1            | 109.4           | 24.2   | 23.7   | 48.6    |
| B3LYP    | 61.9   | 30.2   | 56.1            | 57.8            | 14.2   | 44.0   | 37.3    |
| BH&H     | 4.8    | 65.5   | 0.5             | 14.9            | 55.2   | 23.4   | 27.4    |
| M06      | 48.6   | 18.9   | 66.3            | 78.8            | 4.7    | 58.4   | 46.0    |
| M06-2X   | 2.9    | 63.3   | 0.2             | 0.8             | 46.5   | 12.6   | 21.0    |
| M06-HF   | 90.5   | 98.7   | 53.2            | 44.9            | 72.7   | 53.7   | 69.0    |
| best DFA | M06-2X | M06    | M06-2X          | M06-2X          | M06    | M06-2X | M06-2X  |



Table S17: Absolute errors relative to MP2 ( $AE(\%) = |\beta_{DFT} - \beta_{MP2}|/\beta_{MP2} \times 100$ ) on the total first hyperpolarizabilities of *cis* isomers, as calculated for selected hybrid range-separated functionals.

| DFA              | R = H | R = Me | R = <i>i</i> Pr | R = <i>t</i> Bu | R = Ph          | R = Cy          | Mean AE |
|------------------|-------|--------|-----------------|-----------------|-----------------|-----------------|---------|
| CAM-B3LYP        | 0.2   | 3.3    | 7.1             | 8.6             | 34.6            | 6.7             | 10.1    |
| LC-BLYP          | 57.7  | 36.6   | 43.2            | 30.6            | 64.6            | 40.7            | 45.6    |
| LC-PBE           | 55.0  | 35.8   | 44.6            | 32.9            | 61.0            | 40.7            | 45.0    |
| LC- $\omega$ PBE | 40.6  | 26.7   | 33.0            | 19.7            | 56.2            | 30.8            | 34.5    |
| $\omega$ B97X    | 16.2  | 10.1   | 23.0            | 1.1             | 44.6            | 17.7            | 18.8    |
| $\omega$ B97X-D  | 17.1  | 10.6   | 4.4             | 27.3            | 29.4            | 2.6             | 15.3    |
| best DFA         | CAM   | CAM    | $\omega$ B97X-D | $\omega$ B97X   | $\omega$ B97X-D | $\omega$ B97X-D | CAM     |

## 11 PNOc analysis

Table S18: Vector ( $\beta_i$ ) and tensor ( $\beta_{ijk}$ ) components of the total first hyperpolarizability, as calculated summing all the orbital contributions of the hyperpolarizability tensors obtained by the PNOc analysis at CAM-B3LYP/6-311++G\*\* level.

| Molecule                          | $\beta_{xxx}$ | $\beta_{yyx}$ | $\beta_{zxx}$ | $\beta_x$ | $\beta_{yyy}$ | $\beta_{xyy}$ | $\beta_{zzy}$ | $\beta_y$ | $\beta_{zzz}$ | $\beta_{xxz}$ | $\beta_{yyz}$ | $\beta_z$ | $\beta_{tot}$ |
|-----------------------------------|---------------|---------------|---------------|-----------|---------------|---------------|---------------|-----------|---------------|---------------|---------------|-----------|---------------|
| <b>a</b> (R = <b>H</b> )          | -0.0          | -0.1          | 0.0           | -0.4      | 2.9           | -10.4         | 0.1           | -22.3     | 31.4          | -155.9        | 14.5          | -330.2    | 66.2          |
| <b>b</b> (R = <b>Me</b> )         | -0.4          | -2.2          | 1.9           | -2.1      | 4.2           | 8.3           | -1.1          | 34.3      | -30.7         | -160.7        | -26.7         | -654.4    | 131.1         |
| <b>c</b> (R = <b><i>i</i>Pr</b> ) | -2.3          | -0.9          | 0.6           | -7.9      | -16.0         | 8.6           | 8.2           | 2.0       | -15.6         | -145.6        | 17.7          | -430.6    | 86.1          |
| <b>d</b> (R = <b><i>t</i>Bu</b> ) | -32.2         | 10.1          | -9.5          | -94.9     | -3.0          | 0.5           | 18.4          | 47.8      | -21.7         | -170.2        | 52.4          | -418.5    | 86.3          |
| <b>e</b> (R = <b>Ph</b> )         | -0.3          | -6.3          | 5.9           | -1.9      | 13.7          | 6.6           | -10.2         | 30.3      | 22.7          | -148.1        | -98.6         | -672.3    | 134.6         |
| <b>f</b> (R = <b>Cy</b> )         | 5.4           | 6.0           | -12.1         | -2.2      | 7.7           | 5.4           | -1.7          | 34.2      | -13.5         | -142.5        | -39.9         | -587.8    | 117.8         |
| <b>g</b> (R = <b>Ad</b> )         | 2.7           | -22.4         | 14.3          | -15.9     | -54.3         | -18.5         | 4.1           | -206.0    | -70.2         | -170.0        | 4.2           | -708.0    | 147.5         |

Table S19: Vector ( $\beta_i$ ) and tensor ( $\beta_{ijk}$ ) components of the total first hyperpolarizability, as calculated through the CPKS method at CAM-B3LYP/6-311++G\*\* level.

| Molecule                          | $\beta_{xxx}$ | $\beta_{yyx}$ | $\beta_{zxx}$ | $\beta_x$ | $\beta_{yyy}$ | $\beta_{xyy}$ | $\beta_{zzy}$ | $\beta_y$ | $\beta_{zzz}$ | $\beta_{xxz}$ | $\beta_{yyz}$ | $\beta_z$ | $\beta_{tot}$ |
|-----------------------------------|---------------|---------------|---------------|-----------|---------------|---------------|---------------|-----------|---------------|---------------|---------------|-----------|---------------|
| <b>a</b> (R = <b>H</b> )          | 0.0           | 0.0           | 0.1           | 0.2       | 2.8           | -10.5         | 0.2           | -22.4     | 31.3          | -155.9        | 14.4          | -330.3    | 66.2          |
| <b>b</b> (R = <b>Me</b> )         | 0.1           | -2.0          | 2.1           | 0.8       | 4.1           | 8.3           | -1.1          | 33.6      | -30.2         | -160.5        | -26.5         | -651.5    | 130.5         |
| <b>c</b> (R = <b><i>i</i>P</b> )  | -1.8          | -0.7          | 0.7           | -5.4      | -16.4         | 8.5           | 8.2           | 0.8       | -15.3         | -145.7        | 18.1          | -428.8    | 85.8          |
| <b>d</b> (R = <b><i>t</i>Bu</b> ) | -31.7         | 10.1          | -9.4          | -92.7     | -3.2          | 0.7           | 18.6          | 48.4      | -21.8         | -170.3        | 52.3          | -419.7    | 86.5          |
| <b>e</b> (R = <b>Ph</b> )         | 0.1           | -6.1          | 6.0           | 0.1       | 13.7          | 6.7           | -10.3         | 30.3      | 23.1          | -148.3        | -98.5         | -671.2    | 134.4         |
| <b>f</b> (R = <b>Cy</b> )         | 6.0           | 6.3           | 12.1          | 73.4      | 8.3           | 5.4           | -1.5          | 36.6      | -12.9         | -142.2        | -39.2         | -582.9    | 117.7         |
| <b>g</b> (R = <b>Ad</b> )         | 0.8           | -22.6         | 16.6          | -16.6     | -55.7         | -8.3          | 8.7           | -166.1    | -68.0         | -170.4        | 0.6           | -713.3    | 146.5         |

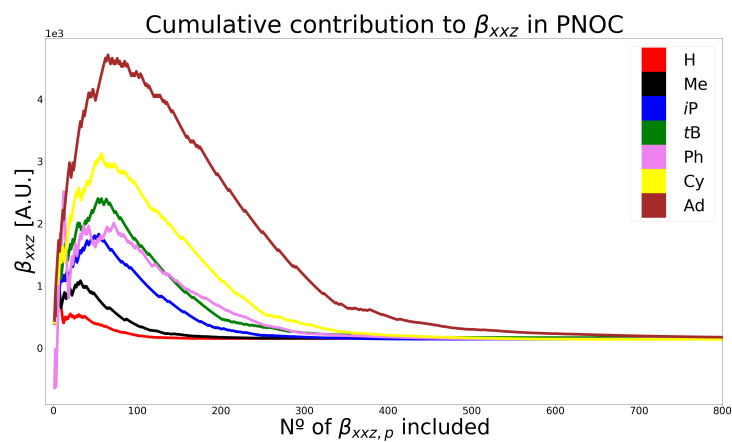

Figure S12: Accumulation of the first most important 800 orbital contributions of  $\beta_{xyz,p}$  for the azobenzene derivatives. The index  $p$  indicates the corresponding orbital that is included.

Table S20: Predominant orbitals and corresponding hyperpolarizability contribution according to PNO decomposition, ordered by importance. Units are a.u. Calculations done with CAM-B3LYP functional for the azobenzene series.  $H$  and  $L$  indicate the HOMO and LUMO for each compound.  $N_H$  is the total number of occupied MOs.

| R=H $N_H=48$ |               |           |               |           |               | R=Me $N_H=64$ |               |           |               |           |               |
|--------------|---------------|-----------|---------------|-----------|---------------|---------------|---------------|-----------|---------------|-----------|---------------|
| $N_{orb}$    | $\beta_{zxx}$ | $N_{orb}$ | $\beta_{zyy}$ | $N_{orb}$ | $\beta_{zzz}$ | $N_{orb}$     | $\beta_{zxx}$ | $N_{orb}$ | $\beta_{zyy}$ | $N_{orb}$ | $\beta_{zzz}$ |
| H            | 397.0         | H-1       | 137.0         | H-3       | 182.5         | H             | 464.7         | H-1       | 204.5         | H-3       | 221.8         |
| H-3          | 268.5         | L+2       | -127.4        | H-2       | 181.2         | H-3           | 356.5         | H-2       | 181.5         | H-2       | 212.8         |
| H-2          | 261.6         | H-3       | 118.7         | L+3       | -169.9        | L+4           | -300.3        | L+2       | -149.0        | L+4       | -156.9        |
| H-4          | 240.2         | H-2       | 109.9         | L+7       | -114.3        | H-2           | 268.7         | L+7       | -146.2        | H-1       | 152.6         |
| L+3          | -200.2        | L+3       | -94.7         | L+1       | -103.7        | L+2           | -244.7        | H-3       | 142.2         | L+2       | -145.4        |
| L+8          | -193.5        | H         | 79.6          | H-1       | 100.4         | H-1           | 224.3         | H         | 122.5         | L+7       | -132.5        |

  

| R=iPr $N_H=96$ |               |           |               |           |               | R=tBu $N_H=112$ |               |           |               |           |               |
|----------------|---------------|-----------|---------------|-----------|---------------|-----------------|---------------|-----------|---------------|-----------|---------------|
| $N_{orb}$      | $\beta_{zxx}$ | $N_{orb}$ | $\beta_{zyy}$ | $N_{orb}$ | $\beta_{zzz}$ | $N_{orb}$       | $\beta_{zxx}$ | $N_{orb}$ | $\beta_{zyy}$ | $N_{orb}$ | $\beta_{zzz}$ |
| H              | 410.9         | H-1       | 263.8         | H-3       | 216.7         | H               | 459.0         | H-1       | 253.9         | H-3       | 222.5         |
| H-3            | 337.4         | H-2       | 215.0         | H-2       | 187.9         | H-3             | 381.5         | H-2       | 203.2         | H-2       | 209.7         |
| H-2            | 246.0         | L+4       | -199.6        | H-1       | 143.0         | H-2             | 239.9         | H-5       | 163.5         | L+6       | -151.8        |
| L+5            | -231.1        | H-3       | 182.8         | L+5       | -113.2        | L+5             | -219.2        | H-4       | 162.9         | H-1       | 141.6         |
| H-1            | 184.5         | H-5       | 157.4         | L+8       | -111.0        | H-1             | 190.5         | H         | 143.0         | L+5       | -134.6        |
| L+6            | -181.5        | H         | 148.4         | L+4       | -107.4        | 105             | 186.9         | L+4       | -138.1        | L+1       | -100.8        |

R=Ph  $N_H=128$ 

| $N_{orb}$ | $\beta_{zxx}$ | $N_{orb}$ | $\beta_{zyy}$ | $N_{orb}$ | $\beta_{zzz}$ |
|-----------|---------------|-----------|---------------|-----------|---------------|
| L+2       | -638.7        | H-1       | 1030.9        | H-1       | 631.0         |
| H-3       | 624.6         | H-2       | 997.7         | H-2       | 533.1         |
| L+1       | -605.1        | L+2       | -953.8        | L+2       | -451.5        |
| H-1       | 528.4         | H-3       | 942.6         | L+3       | -434.8        |
| H-2       | 505.2         | L+3       | -862.9        | H+2       | -285.8        |
| H-5       | 494.8         | H+2       | -860.3        | H-6       | 272.5         |

R=Cy  $N_H=140$ 

| $N_{orb}$ | $\beta_{zxx}$ | $N_{orb}$ | $\beta_{zyy}$ | $N_{orb}$ | $\beta_{zzz}$ |
|-----------|---------------|-----------|---------------|-----------|---------------|
| H         | 408.4         | H-1       | 327.0         | H-3       | 214.1         |
| H-3       | 332.7         | H-2       | 286.2         | H-2       | 193.2         |
| H-2       | 265.1         | H-3       | 224.2         | H-1       | 158.6         |
| H-1       | 207.8         | H-5       | 213.8         | L+5       | -151.1        |
| L+5       | -185.3        | H-16      | 198.8         | H-16      | 149.2         |
| H-7       | 169.9         | L+5       | -197.4        | H-13      | 148.8         |

R=Ad  $N_H=196$ 

| $N_{orb}$ | $\beta_{zxx}$ | $N_{orb}$ | $\beta_{zyy}$ | $N_{orb}$ | $\beta_{zzz}$ |
|-----------|---------------|-----------|---------------|-----------|---------------|
| H         | 448.86        | H-1       | 330.88        | H-3       | 229.41        |
| H-3       | 352.31        | H-2       | 287.14        | H-2       | 205.59        |
| H-2       | 265.25        | H-3       | 208.47        | H-1       | 175.41        |
| H-1       | 235.28        | H-5       | 207.32        | H-9       | 158.35        |
| H-6       | 224.77        | H         | 189.34        | H-12      | 157.32        |
| H-7       | 205.63        | H-7       | 184.2         | H-15      | 134.75        |

Table S21: Comparison between the predominant orbital contribution of the hyperpolarizability (in a. u.) tested for the functionals CAM-B3LYP and PBE performed on the substituents R=*i*Pr and R=Ph. *H* indicates the number of the HOMO orbital for each compound while *L* indicates the corresponding LUMO.

| R= <i>i</i> P $N_H=96$ |               |           |               | R=Ph $N_H=128$ |               |           |               |
|------------------------|---------------|-----------|---------------|----------------|---------------|-----------|---------------|
| CAM-B3LYP              |               | PBE       |               | CAM-B3LYP      |               | PBE       |               |
| $N_{orb}$              | $\beta_{zxx}$ | $N_{orb}$ | $\beta_{zxx}$ | $N_{orb}$      | $\beta_{zxx}$ | $N_{orb}$ | $\beta_{zxx}$ |
| H                      | 410.9         | H-3       | 561.7         | L+2            | -638.7        | L+2       | -918.82       |
| H-3                    | 337.4         | H-4       | 514.8         | H-3            | 624.6         | H-3       | 862.83        |
| H-2                    | 246.0         | L+3       | -405.5        | L+1            | -605.1        | L+1       | -795.17       |
| L+4                    | -231.1        | L+2       | -357.6        | H-1            | 528.4         | H-2       | 685.38        |
| H-1                    | 184.5         | L+1       | -335.4        | H-2            | 505.2         | H-4       | 608.30        |
| L+5                    | -181.5        | H         | 268.4         | H-5            | 494.8         | H-1       | 593.97        |

## References

- (S1) Gould, T. ‘Diet GMTKN55’ offers accelerated benchmarking through a representative subset approach. *Phys. Chem. Chem. Phys.* **2018**, *20*, 27735–27739.
- (S2) Perdew, J. P.; Burke, K.; Ernzerhof, M. Generalized Gradient Approximation Made Simple. *Phys. Rev. Lett.* **1996**, *77*, 3865–3868.
- (S3) Zhao, Y.; Truhlar, D. G. The M06 Suite of Density Functionals for Main Group Thermochemistry, Thermochemical Kinetics, Noncovalent Interactions, Excited States, and Transition Elements: two New Functionals and Systematic Testing of Four M06-Class Functionals and 12 Other Functionals. *Theor. Chem. Acc.* **2008**, *120*, 215–241.
- (S4) Vydrov, O. A.; Van Voorhis, T. Nonlocal van der Waals density functional: The simpler the better. **2010**, *133*, 244103.

- (S5) Stephens, P. J.; Devlin, F. J.; Chabalowski, C. F.; Frisch, M. J. Ab Initio Calculation of Vibrational Absorption and Circular Dichroism Spectra Using Density Functional Force Fields. *The Journal of Physical Chemistry* **1994**, *98*, 11623–11627.
- (S6) Perdew, J. P.; Burke, K.; Ernzerhof, M. Generalized Gradient Approximation Made Simple. *Phys. Rev. Lett.* **1996**, *77*, 3865–3868.
- (S7) Becke, A. D. A new mixing of Hartree–Fock and local density-functional theories. *The Journal of Chemical Physics* **1993**, *98*, 1372–1377.
- (S8) Yanai, T.; Tew, D. P.; Handy, N. C. A new hybrid exchange–correlation functional using the Coulomb-attenuating method (CAM-B3LYP). *Chem. Phys. Lett.* **2004**, *393*, 51 – 57.
- (S9) Vydrov, O. A.; Scuseria, G. E. Assessment of a long-range corrected hybrid functional. *The Journal of Chemical Physics* **2006**, *125*, 234109.
- (S10) Iikura, H.; Tsuneda, T.; Yanai, T.; Hirao, K. A long-range correction scheme for generalized-gradient-approximation exchange functionals. *The Journal of Chemical Physics* **2001**, *115*, 3540–3544.
- (S11) Besalú-Sala, P.; Sitkiewicz, S. P.; Salvador, P.; Matito, E.; Luis, J. M. A new tuned range-separated density functional for the accurate calculation of second hyperpolarizabilities. *Phys. Chem. Chem. Phys.* **2020**, *22*, 11871–11880.
- (S12) Chai, J.-D.; Head-Gordon, M. Systematic optimization of long-range corrected hybrid density functionals. *The Journal of Chemical Physics* **2008**, *128*, 084106.
- (S13) Chai, J.-D.; Head-Gordon, M. Long-range corrected hybrid density functionals with damped atom–atom dispersion corrections. *Phys. Chem. Chem. Phys.* **2008**, *10*, 6615–6620.

- (S14) Sitkiewicz, S.; Ramos-Cordoba, E.; Luis, J. M.; Matito, E. How Many Electrons Does a Molecular Electride Hold? *J. Phys. Chem. A* doi:10.1021/acs.jpca.1c02760, accepted.
- (S15) Luchini, G.; Alegre-Requena, J.; Funes-Ardoiz, I.; Paton, R. GoodVibes: automated thermochemistry for heterogeneous computational chemistry data [version 1; peer review: 2 approved with reservations]. *F1000Research* **2020**, *9*.
- (S16) Grimme, S. Supramolecular Binding Thermodynamics by Dispersion-Corrected Density Functional Theory. *Chemistry – A European Journal* **2012**, *18*, 9955–9964.
- (S17) Li, Y.-P.; Gomes, J.; Mallikarjun Sharada, S.; Bell, A. T.; Head-Gordon, M. Improved Force-Field Parameters for QM/MM Simulations of the Energies of Adsorption for Molecules in Zeolites and a Free Rotor Correction to the Rigid Rotor Harmonic Oscillator Model for Adsorption Enthalpies. *The Journal of Physical Chemistry C* **2015**, *119*, 1840–1850.
